1    **APRIL drives a co-ordinated but diverse response as a**  
2    **foundation for plasma cell longevity.**

3  
4    Sophie Stephenson<sup>1\*</sup>, Matthew A Care<sup>1,2\*</sup>, Gina M Doody<sup>1</sup>, Reuben M Tooze<sup>1,3</sup>

5  
6    <sup>1</sup>Division of Haematology and Immunology, Leeds Institute of Medical Research, University  
7    of Leeds, Leeds, LS9 7TF, UK

8    <sup>2</sup>Bioinformatics Group, School of Molecular and Cellular Biology, University of Leeds

9    \*These authors contributed equally to this work

10    <sup>3</sup>Corresponding author: Reuben Tooze tel: (44)-113-3438639, fax: (44)-113-3438502, e-mail:  
11    [r.tooze@leeds.ac.uk](mailto:r.tooze@leeds.ac.uk)

12  
13    Key words: Human, B cells, Plasma Cell, Plasmablast, Antibodies, Cell Activation, APRIL,  
14    MYC, Cell growth, Myeloma

15    <sup>1</sup>

16

---

<sup>1</sup> **Grant support:** this work was supported by Cancer Research UK programme grant (C7845/A17723 and C7845/A29212), and Cancer Research accelerator award (C355/A26819).

17 **Abstract**

18 Antibody secreting cells (ASCs) survive in niche microenvironments, but cellular responses  
19 driven by particular niche signals are incompletely defined. The TNF superfamily member  
20 APRIL provides a niche signal that can support the transition of transitory plasmablasts into  
21 long-lived plasma cells. Here we explore how APRIL helps to establish the biological  
22 programs that promote life in the niche, by studying the initial response of primary human  
23 plasmablast to APRIL. Under conditions allowing the maturation of ex vivo or in vitro  
24 generated plasmablasts, we find that APRIL drives activation of ERK, p38 and JNK. This is  
25 accompanied by a classical NF $\kappa$ B response. Under these conditions induction of AKT  
26 phosphorylation is also observed with similar kinetics, paralleled by FOXO1 phosphorylation  
27 and nuclear exclusion. Time course gene expression data resolve the downstream co-  
28 ordinated transcriptional response. The APRIL-signal propagates via immediate early genes  
29 and classical NF $\kappa$ B responsive targets to converge onto modules of MYC- and OCT2-  
30 regulated gene expression linked to cell growth, as well as leading to enhanced expression  
31 of ICAM1 and SQSTM1 associated with adhesion and metabolic/stress responses. Thus,  
32 APRIL drives a combination of multiple transcriptional programs that co-ordinate cell  
33 growth, stress response and adhesion in human ASCs, providing a broad foundation to  
34 support plasma cell longevity.

35

## 36 Introduction

37 The survival of plasma cells (PCs) is dependent on specific niche conditions. On the one hand  
38 this allows the maintenance of long-lived humoral immunity, and on the other hand  
39 provides a flexible mechanism for limiting the PC pool.(1) Additionally, both the nature of  
40 the differentiating B-cell, the type of signal driving differentiation and the nature of the  
41 niche in which the antibody secreting cell (ASC) eventually survives as a long-lived PC (also  
42 referred to as memory PCs) may convey functional specialization.(2, 3) Several niche factors  
43 have been defined which may contribute to the survival of an ASC and allow the maturation  
44 from the transitional plasmablast (PB) state, which couples proliferation and acquisition of  
45 secretory capacity, to the quiescent but long-lived PC state.(1, 4-6) However, relatively little  
46 is known regarding the usage of specific signaling pathways and the downstream  
47 transcriptional responses to specific niche signals in ASCs. Here we use a model system  
48 which allows the in vitro generation of long-lived human PCs to study the response of  
49 human ASCs to the niche factor APRIL, as the cells initiate the final differentiation step to  
50 the quiescent PC state.

51 APRIL belongs to the TNF-superfamily (TNFSF). This superfamily along with its cognate  
52 receptors, includes several critical regulators of B-cell survival, activation and commitment  
53 to the ASC differentiation fate.(7) APRIL and its most closely related TNFSF member BAFF  
54 share partially overlapping receptors in BCMA (TNFRSF17), TACI (TNFRSF13B) and BAFFR  
55 (TNFRSF13C).(8) These receptors are themselves regulated during differentiation of B-cells,  
56 such that BAFFR dominates in resting B-cells allowing effective signaling from BAFF but not  
57 APRIL, while BCMA predominates in PBs and PCs. TACI bridges these patterns with  
58 expression peaking during activation.(7) This provides the potential for preferential  
59 responses from APRIL rather than BAFF at later stages of differentiation. Further layers of

60 regulation operate both in relation to the shedding of surface receptors, and the extent of  
61 oligomerization of the ligands.(9) Notably BCMA, the primary receptor for APRIL, can be  
62 cleaved and shed from the cell surface by the action of  $\gamma$ -secretase, which has recently been  
63 identified as a limiting factor for APRIL responses in PC populations in vivo and in cell lines in  
64 vitro.(10)

65 The importance of APRIL/BCMA signals to PC survival has been indicated both in murine  
66 knockouts(11, 12) and in humans where targeting has been explored as a therapeutic  
67 avenue in rheumatological conditions.(13, 14) In both contexts the data support the  
68 conclusion that signals delivered by these factors are required for optimal PC survival.  
69 Functionally, in murine PCs BCMA signals supports survival through induction of MCL1(15)  
70 and BCMA signals can also support myeloma cell survival in vitro and in vivo.(16) Studies of  
71 signaling have demonstrated the activation of MAP kinase pathways and classical NF $\kappa$ B  
72 responses in B-cells following stimulation with BAFF and in cell line models of PC neoplasia  
73 in response to APRIL.(7, 17) In heterologous expression systems BCMA signaling has been  
74 shown to have the potential to activate p38, JNK MAP kinase pathways alongside classical  
75 NF $\kappa$ B responses.(18) Indeed, in PC neoplasia mutations affecting the NF $\kappa$ B pathway, are  
76 frequent events associated with progression and independence from niche survival signals,  
77 potentially substituting in part for APRIL/BCMA signals.(19-21) While APRIL has been shown  
78 to provide a survival signal for PCs in vitro and in vivo, the signaling and immediate gene  
79 regulatory responses triggered by this factor in human ASCs have not to our knowledge  
80 been explored in detail.

81 Here we have addressed the question of how human ASCs respond to the APRIL niche signal  
82 focusing on the responses that occur at the transition between proliferating PB and  
83 quiescent PC. Under conditions that efficiently promote the survival of both in vitro

84 generated and ex vivo derived human PBs, APRIL drives a selective pattern of MAP kinase  
85 activation alongside classical NF $\kappa$ B signaling and AKT activation. The APRIL response induces  
86 a series of gene expression changes including waves of immediate early and secondary  
87 response genes, which converge onto MYC and cell growth modules of gene expression and  
88 also include changes in genes such as *ICAM1* related to cell adhesion. Thus, while promoting  
89 survival, APRIL delivers a complex signal potentially promoting growth as well as adhesion in  
90 PCs.

91

92

## 93 **Materials & Methods**

### 94 **Reagents**

95 IL2, IL21, IL6, IFN $\alpha$  (Miltenyi); Multimeric-APRIL H98, Multimeric-CD40L (AdipoGen); Goat  
96 anti-human IgM & IgG F(ab')<sub>2</sub> fragments (Jackson ImmunoResearch); Lipid Mixture 1,  
97 chemically defined (200X) and MEM Amino Acids Solution (50X) (Sigma); L-685,458 (gamma-  
98 secretase inhibitor, GSI) (Tocris).

### 99 **Donors and cell isolation**

100 Peripheral blood was obtained from healthy donors after informed consent. The number of  
101 donors per experiment is indicated in the figure legend, with each symbol representing a  
102 different donor. Mononuclear cells were isolated by Lymphoprep (Abbott) density gradient  
103 centrifugation. Total B-cells were isolated by negative selection with the Memory B-cell  
104 Isolation Kit (Miltenyi).

105 Peripheral blood samples from anonymous donors were obtained on day 6-8 post influenza  
106 vaccination (2017-18). BCMA positive cells were isolated using a combination of BCMA-  
107 biotinylated antibody and anti-biotin microbeads (Miltenyi).

### 108 **Cell cultures**

109 Cells were maintained in Iscove's Modified Dulbecco Medium (IMDM) supplemented with  
110 Glutamax and 10% heat-inactivated fetal bovine serum (HIFBS, Invitrogen); Lipid Mixture 1,  
111 chemically defined and MEM Amino Acids solution (both at 1x final concentration) were  
112 added from day 3 onwards.

113 Day 0 to day 3 – B cells were cultured in 24 well plates at  $2.5 \times 10^5$ /ml with IL2 (20 U/ml),  
114 IL21 (50 ng/ml), F(ab')<sub>2</sub> goat anti-human IgM & IgG (2  $\mu$ g/ml) on  $\gamma$ -irradiated CD40L  
115 expressing L-cells ( $6.25 \times 10^4$ /well).

116 Day 3 to day 6 – At day 3, cells were detached from the CD40L L-cell layer and reseeded at 1  
117  $\times 10^5$ /ml in media supplemented with IL2 (20 U/ml) and IL21 (50 ng/ml).

118 Day 6 to day 13 – At day 6, cells were harvested and seeded at  $1 \times 10^6$ /ml in media  
119 supplemented with IL6 (10ng/ml), IL21 (10 ng/ml), GSI (100nM) and Multimeric-APRIL  
120 (100ng/ml - unless otherwise stated).

121 For gene expression experiments, cells were seeded at day 6 at  $1 \times 10^6$ /ml in phenol red  
122 free media supplemented with 0.5% HIFBS, IL6 (10 ng/ml), IL21 (10 ng/ml) and GSI (100nM)  
123 for 16-20 hours. Multimeric-APRIL (100ng/ml) or SDF1 (1 ng/ml) was added and cells  
124 analyzed at indicated times.

125 For culture of ex vivo cells, following isolation cells were cultured in media containing IL6  
126 (10ng/ml) and IL21 (10ng/ml) for 24 hours. Cells were then harvested and transferred into  
127 media containing IL6 (10ng/ml) and either Multimeric-APRIL (100ng/ml) and GSI (100nM);  
128 or IFN $\alpha$  (100u/ml) for 14 days. Half the media was replenished after 7 days.

### 129 **Flow cytometric analysis**

130 Cells were analyzed using 4- to 6-color direct immunofluorescence staining on a Cytoflex LX  
131 or S (Beckman Coulter) flow cytometer. Antibodies used were: CD19 PE (LT19), CD138 APC  
132 (44F9) (Miltenyi); CD20 e450 (2H7) (eBioscience); CD27 FITC (M-T271), CD38 PECy7 (HB7),  
133 CD54 PE (HA58) (BD Biosciences). Controls were isotype-matched antibodies or FMOs. Dead  
134 cells were excluded by 7-AAD (BD Biosciences). Absolute cell counts were performed with  
135 CountBright beads (Invitrogen). Cell populations were gated on FSC and SSC profiles for  
136 viable cells determined independently in preliminary and parallel experiments. Analysis was  
137 performed with FlowJo version 10 (BD Biosciences) and Prism 8 (GraphPad). Statistical  
138 analysis performed was either Two-tailed paired T-test or RM one-way ANOVA, Tukey's  
139 multiple comparisons test.

140 **RNA, cDNA and RT-PCR**

141 RNA was extracted with TRIzol (Invitrogen), subjected to DNaseI treatment (DNAfree,  
142 Ambion) and reverse transcribed using Superscript II Reverse Transcriptase (Invitrogen).  
143 Taqman® Assays for *FOS* (Hs00170630\_m1), *FOSB* (Hs00171851\_m1), *EGR1*  
144 (Hs00152928\_m1) and *PPP6C* (Hs00254827\_m1) were carried out according to  
145 manufacturer's instructions and run on a Stratagene Mx3005p.

146 **Protein analysis**

147 At the indicated time points, cells were lysed in Laemmli buffer. For cytoplasmic:nuclear  
148 protein samples, proteins were extracted using a cytoplasmic and nuclear extraction kit  
149 (Boster Bio) and protein concentration determined by BCA assay (Boster Bio). Samples were  
150 separated by SDS-PAGE and transferred to nitrocellulose. Proteins were detected by ECL  
151 (SuperSignal WestPico PLUS, Thermo Scientific) and visualized on a ChemiDoc (BioRad) or  
152 film. Protein bands were quantitated using Image Lab 6.0.1 software (BioRad).

153 Antibodies used were p-AKT, AKT, p-ERK1/2, ERK1/2, p-FOXO1/3/4, FOXO1, FOXO3, p-JNK,  
154 JNK, p-p38, p38, MYC, RELA, p-SQSTM1 T269/S272, SQSTM1 (CST); TUBULIN (Merck);  
155 BLIMP-1 R23;(22) goat anti-mouse HRP, goat anti-rabbit HRP (Jackson ImmunoResearch).

156 **ELISpot**

157 Influenza specific immunoglobulin was detected as previously described.(23) Inactivated  
158 influenza vaccine manufactured by Sanofi Pasteur MSD was used for coating plates.

159 For detection of human IgG secretion, a Human ELISpot<sup>BASIC</sup> IgG kit (Mabtech) was used. The  
160 assay was performed as described in the manufacturer's protocol, and 1000/2000 cells were  
161 added as indicated in the figure. Cells were incubated on plates for 16-20 hours in IMDM  
162 containing either standard amounts of IL6 and IL21 (control), or IL6 with either IFN $\alpha$  or  
163 APRIL/GSI.



164 **Gene expression data acquisition and analysis**

165 Gene expression data sets were generated from differentiating PBs (day 7). At day 6, PBs  
166 from 4 healthy donors were seeded at  $1 \times 10^6$ /ml in phenol red free IMDM supplemented  
167 with 0.5% HIFBS, IL6 (10 ng/ml), IL21 (10 ng/ml) and GSI (100nM) and incubated for 20  
168 hours. Multimeric-APRIL (100ng/ml) was then added. A pre-treatment sample (0 minutes)  
169 and post treatment samples were removed at +30, +60, +120 and +360 minutes.

170 RNA was obtained using TRIzol (Invitrogen) and sequencing libraries generated with a  
171 TruSeq Stranded Total RNA Human/Mouse/Rat kit (Illumina). Libraries were sequenced on a  
172 NextSeq500 platform (Illumina), using 76-bp single-end sequencing, for details of fastq files  
173 initial quality assessment, trimming, alignment and annotation see supplemental methods.  
174 Transcript abundance was estimated using RSEM v1.3.0 and processed using DESeq2 to  
175 determine differential gene expression. Expression data sets are available with GEO  
176 accession GSE173644.

177 **Network analysis**

178 For details of the Parsimonious Gene Correlation Network Analysis (PGCNA) approach see  
179 supplemental methods.(24) For the bulk RNA-seq network transcripts differentially  
180 expressed across the timeseries data (DESeq2 LRT FDR < 0.01) were merged per gene by  
181 taking the median value for transcript sets with a Pearson correlation  $\geq 0.2$  and the  
182 maximum value for those with a correlation < 0.2 giving a 4,615 x 20 matrix. This was used  
183 for a PGCNA2 analysis (-n 1000, -b 100) giving a network with 16 modules. The median  
184 expression per timepoint was visualized as Z-scores mapped onto the network. The top 25  
185 genes per module by network strength were used to generate Module Expression Values by  
186 summing their Z-scores (normalized across cells) per cell and visualized as a hierarchically  
187 clustered heatmap.

## 188 **scRNA-seq networks**

189 The Croote et al peripheral blood single cell data was downloaded as counts per gene (Table  
190 S1 of manuscript), consisting of 973 cells.(25) Cells with biased expression of genes related  
191 to growth-factor-signaling/IEG likely to reflect a handling artefact were identified and  
192 filtered (see Supplemental Methods). Data for the 655 remaining cells we re-filtered to  
193 retain consistently expressed genes (count  $\geq 5$  in  $\geq 10\%$  of cells) yielding 3,436 genes.  
194 PGCNA was carried out generating a network with 22 modules. The genes per module were  
195 summed and the transposed matrix used to generate a PGCNA network of the cells.

## 196 **Network availability**

197 Interactive networks and meta-data are available at <https://mcare.link/STC-APRIL>.

## 198 **Gene signature data and enrichment analysis**

199 A set of 40,686 signatures was generated by merging gene-ontology and gene-signatures as  
200 previously described (see Supplemental Methods).(24) Enrichment of gene lists for  
201 signatures was assessed using a hypergeometric test, in which the draw is the gene list  
202 genes, the successes are the signature genes, and the population is the genes present on  
203 the platform.

## 204 **Heatmap visualizations**

205 The gene expression data and GSE results were both visualized using the Broad GENE-E  
206 package (<https://software.broadinstitute.org/GENE-E/>). For visualization of expression  
207 data, the Module Expression Values were visualized on a global scale. For GSE the  
208 signatures were filtered (FDR  $< 0.1$  and  $\geq 5$  and  $\leq 1500$  genes for the signature sets, selecting  
209 the top 15 most significant signatures per module) and the enrichment/depletion z-scores  
210 visualized. In both cases the data was hierarchically clustered (Pearson correlations and

211 average linkage).

212 **Ethical approval**

213 Approval for this study was provided by UK National Research Ethics Service via the Leeds

214 East Research Ethics Committee, approval reference: 07/Q1206/47.

215

## 216 Results

217 *APRIL supports in vitro PC survival which is enhanced by  $\gamma$ -secretase inhibition.*

218 We have previously defined conditions which allowed the generation of long-lived PCs in  
219 vitro both using stromal support and independent of stroma using type-1 IFN or TGFB  
220 mediated survival signals.(5, 6) These conditions allowed PC survival in the absence of  
221 defined TNFSF signaling, and in the absence of detectable NF $\kappa$ B mediated transcriptional  
222 response as assessed by gene signature analysis.(3, 5) This was notable since TNFSF  
223 members and in particular APRIL are considered to act at least in part through the provision  
224 of an NF $\kappa$ B pathway signal,(7) and APRIL can support PC survival in vitro.(26, 27) We  
225 therefore aimed to analyse a model system in which an NF $\kappa$ B signal was delivered as the PC  
226 completed differentiation.

227 We first used the ability of APRIL to support PC survival as a functional indicator of effective  
228 signaling. Initially performing a dose response, we observed that PC survival could be  
229 effectively supported by APRIL in multimeric form but required significant quantities (Figure  
230 1A). Under these conditions the phenotype of the differentiated cells was consistent with an  
231 early PC state showing strong CD38 expression, partial upregulation of CD138 and loss of  
232 CD20 (Figure 1B). Recently it was observed that BCMA, the primary surface receptor for  
233 APRIL, expressed on ASCs was subject to active proteolytic shedding and that this was  
234 dependent on  $\gamma$ -secretase activity.(10) We therefore tested whether this effect was  
235 observed in ASCs in the model system. Indeed,  $\gamma$ -secretase inhibition substantially  
236 augmented the expression of cell surface BCMA during in vitro differentiation. A 6-fold  
237 enhancement of BCMA expression was observed following  $\gamma$ -secretase inhibition (Figure  
238 1C), and this increase was largely maintained in the presence of APRIL stimulation (Figure  
239 1D).

240 The enhancement of surface BCMA expression following  $\gamma$ -secretase inhibition translated  
241 into a significant increase in the impact of APRIL on in vitro PC survival (Figure 1E). This  
242 increase in viability was associated with a generally similar phenotype of cell populations  
243 (Figure 1F and G). Thus, the APRIL mediated survival benefit for PC populations in vitro can  
244 be enhanced by inhibition of BCMA shedding in a fashion consistent with the model  
245 proposed by Laurent et al.(10) and providing further evidence that surface shedding is an  
246 intrinsic feature limiting BCMA signals at the PB to PC transition.

247

248 *APRIL support for ex vivo PB survival is enhanced by  $\gamma$ -secretase inhibition.*

249 Since the combination of APRIL and  $\gamma$ -secretase inhibition provided an effective condition  
250 for in vitro derived PB/PC transition we next sought to determine whether this would also  
251 provide support for ex vivo PBs. We therefore isolated PBs from 5 donors following seasonal  
252 influenza vaccination at day-7 of the vaccine response and transferred these cells into  
253 survival conditions with either IFN $\alpha$  or APRIL and  $\gamma$ -secretase inhibition. Two weeks later we  
254 assessed the phenotype, number and secretory function of the PC population (Figure 2). For  
255 all donors tested, the number of viable cells at two weeks was significantly greater in the  
256 presence of APRIL and  $\gamma$ -secretase inhibition than in the presence of IFN $\alpha$  (Figure 2A).  
257 Phenotypically the conditions were similar in generating CD19<sup>lo</sup> CD27<sup>hi</sup> CD38<sup>hi</sup> and CD138<sup>hi</sup>  
258 PCs (Figure 2B). However, consistently in the presence of APRIL and  $\gamma$ -secretase inhibition  
259 the expression level of CD19 and CD27 was higher and the CD38 expression lower (Figure  
260 2C). Functionally the cell populations generated were indistinguishable at the level of per  
261 cell secretion of IgG as assessed by ELISpot and included influenza vaccine specific ASCs  
262 (Figure 2D and E and Supplemental Figure 1 B and C). We conclude therefore that IFN $\alpha$  and  
263 APRIL, which provide distinct signals, can each promote survival and maturation of ex vivo

264 PBs sustaining a similar population of PCs in terms of antibody secretion and phenotype.  
265 The subtle but reproducible differences in surface phenotype observed for in vitro  
266 differentiated PCs under distinct niche conditions supports the contention that intracellular  
267 signals activated by the survival niche in which a PB matures impact on the functional state  
268 of the resulting PC.

269

270 *APRIL drives sustained activation of MAP kinase pathways.*

271 Having established conditions under which APRIL supported survival of both in vitro  
272 generated and ex vivo derived PBs and allowed maturation of these populations to the PC  
273 state, we were in a position to evaluate the downstream signaling pathways regulated  
274 during this response. We focused on the initial transition when the PB encounters the APRIL  
275 signal. We have previously shown that another PC niche signal, SDF1, drives potent  
276 activation of ERK MAP-kinase within 5 minutes of activation.(6) We therefore initially  
277 evaluated whether this was a response shared with APRIL. In contrast to SDF1 stimulation,  
278 APRIL induced a more delayed activation of ERK peaking at 30 minutes (Figure 3A). APRIL  
279 also activated p38 and JNK, which was sustained for 120 minutes following APRIL  
280 stimulation (Figure 3B and C). We tested whether the differences in upstream pathway  
281 activation might translate into differences in immediate early gene (IEG) regulation and  
282 indeed APRIL showed both a more modest amplitude for *FOS*, *FOSB* and *EGR1* induction, as  
283 well as a more delayed kinetics of peak response for *FOS* and *EGR1* compared to SDF1 (Fig.  
284 3E). Thus, APRIL drives activation of MAP-kinase pathway in PBs and leads to induction of  
285 IEGs, with different kinetics from that observed with SDF1.

286

287 *APRIL activates classical NFκB responses and induces AKT phosphorylation and FOXO1*  
288 *nuclear exclusion*

289 The NFκB pathway is considered to be of central importance for activation and survival  
290 signaling downstream of TNF receptor super family (TNFRSF) members and can itself drive  
291 expression of IEGs. In cell lines APRIL has been principally linked to activation of the classical  
292 NFκB pathway.(18) Consistent with this we observed rapid induction of IκBα  
293 phosphorylation and subsequent sustained loss of IκBα protein following APRIL stimulation  
294 of PBs (Figure 4A). This phosphorylation and loss of IκBα also correlated with nuclear  
295 translocation of RELA (Figure 4B). While CD40L stimulation also induced IκBα  
296 phosphorylation and subsequent sustained loss of IκBα protein in PBs (Figure 4A), unlike  
297 APRIL, CD40L addition at the PB stage contributed to subsequent expansion of cells with  
298 retained B-cell features, rather than promoting the emergence of a phenotypic PC  
299 population (Supplemental Figure 2 A and B). Thus, these TNFSF/TNFRSF pairs have quite  
300 distinct impacts on the fate of differentiating ASC populations when encountered at the PB  
301 stage with APRIL promoting both NFκB activation and supporting PC differentiation.

302 PI3kinase pathway activation leading to AKT phosphorylation and regulation of FOXO family  
303 members is a critical element of survival and activation signaling during earlier stages of B-  
304 cell differentiation. Recently it has been proposed that stromal mediated survival signals  
305 may contribute specifically to PC survival through activation of the AKT-FOXO pathway,  
306 while APRIL acts more selectively via NFκB. We therefore examined whether APRIL signaling  
307 could induce AKT activation.(27) Indeed, induced phosphorylation of AKT at both S473 and  
308 T308 was observed in response to APRIL (Figure 4C and D). This showed a prolonged kinetics  
309 and was maintained to 120 minutes after stimulation. Although S473 phosphorylation was  
310 more intense than that of T308, full activation of the pathway was supported by induced

311 phosphorylation of FOXO1/3 with a kinetics consistent with the pattern of AKT activation  
312 (Figure 4E). Both FOXO1 and FOXO3 were expressed in PBs, but FOXO3 was restricted to the  
313 cytoplasmic fraction prior to stimulation. In contrast FOXO1 was present in both cytoplasmic  
314 and nuclear fractions and showed evidence of nuclear exclusion at later time points after  
315 APRIL treatment, consistent with an active signaling in response (Figure 4F). The kinetics of  
316 this response paralleled that of other acute signaling pathways, and in the context of the  
317 model tested was independent of stromal contact. Therefore, APRIL signals can suffice to  
318 activate the AKT-FOXO pathway and drive FOXO1 nuclear exclusion at the PB to PC  
319 transition.

320

### 321 *APRIL signals propagate to a robust gene expression response*

322 We next sought to evaluate the overall impact of APRIL on gene expression in differentiating  
323 PBs. We applied a combination of gene expression time course and parsimonious gene  
324 correlation network analysis (PGCNA),(28) evaluating samples with RNAseq at 30, 60, 120  
325 and 360 minutes after stimulation with APRIL. We analyzed the data for differentially  
326 expressed genes across the time series using a likelihood ratio test (FDR <0.01;  
327 Supplemental Table 1 available online). The resulting 4,615 genes were used to generate a  
328 gene correlation network which resolved into 16 modules (Figure 5A, Supplemental Tables 2  
329 and 3 available online; <https://mcare.link/STC-APRIL>). We analysed the biology associated  
330 with these gene expression modules using gene signature and ontology enrichment analysis  
331 (Supplemental Figure 3 and online resources). This demonstrated a distinct segregation of  
332 enriched biology across the early response gene modules (M2 and M3) and secondary  
333 response gene modules (M6, M9 and M13). For each module a suitable summary term was  
334 derived from the observed enriched ontologies and signatures.



335 To assess the kinetics of gene expression change, the relative gene expression was overlaid  
336 on the network and assessed as a Module Expression Value (MEV) heatmap (Figure 5B and C  
337 and online resources). This revealed a distinct wave of gene expression propagating around  
338 the network. The initial activation was observed in module M2, enriched for IEGs, and genes  
339 linked to the gene signature of “TNF response not mediated by NFκB”. This is consistent  
340 with an initial wave of gene expression downstream of MAP kinase pathway activation,  
341 which was followed at 60 minutes by the induction of modules enriched for genes linked to  
342 NFκB signaling and the response to TNF (M3). This module (M3) was sustained to 120  
343 minutes at which time it was joined by a wider diversity of NFκB target genes (M6) and a  
344 module of genes enriched for factors involved in RNA splicing. Finally, by 360 minutes as the  
345 initial signaling modules (M2, M3 and M6) waned in expression the secondary response of  
346 gene expression was enriched for modules related to MYC (M9 and M13) and OCT2 targets  
347 (M13) along with the ribosome (M9) and proteasome (M7). Thus, the response to APRIL  
348 follows a classical pattern involving a dominant initial impact on IEGs followed by NFκB  
349 response modules and ultimately leads to the expression of functional gene modules that  
350 indicate a contribution for MYC and OCT2 in gene regulation. Indeed, while PBs express  
351 modest amounts of MYC relative to activated B-cells, MYC protein remained detectable  
352 across the time course and showed modest induction following APRIL stimulation by 60 to  
353 120 minutes (Supplemental Figure 2C-E).

354

### 355 *Expression of MCL1 correlates principally with ASC state rather than APRIL response*

356 A mechanism that may couple APRIL/BCMA signaling to PC survival is the suppression of  
357 apoptosis through regulation of MCL1.(15) While we found modest evidence of  
358 upregulation for *MCL1* and *BCL2* following APRIL stimulation of PBs, the response for *MCL1*

359 in particular was subtle and occurred in the context of significant *MCL1* expression at all  
360 stages of the time course. This suggested that expression of *MCL1* was a feature of the PB  
361 state largely independent of APRIL stimulation. To assess whether this was also a feature of  
362 primary human ex vivo ASCs at the PB stage we turned to an external data source, taking  
363 advantage of single cell gene expression data which has been generated from peripheral  
364 blood B-cells and PBs.(25) To analyse these data in an analogous fashion to our gene  
365 expression time course, we modified the PGCNA approach and applied this to the single cell  
366 expression data. The resulting network resolved into 22 modules (Figure 6A, Supplemental  
367 Tables 4 and 5 available online) separating into modules representative of the B-cell state  
368 (sc\_M3) (Supplemental Figure 4 and online resources), and primary features of the PC state  
369 (sc\_M10). Other modules separated expression features related to B-cell activation and PC  
370 differentiation (sc\_M1), exosomes and adhesion (sc\_M2), ribosomes/translation (sc\_M5),  
371 proliferation/MYC-target genes (sc\_M7) and mitochondrial genes (sc\_M22). The resolved  
372 modules of gene expression were differentially expressed between individual cells and  
373 allowed separation of clusters of resting or activated B-cells from PBs (Figure 6B).

374 *PRDM1*, encoding BLIMP1 a master regulator of PC differentiation, was identified as the hub  
375 gene of module sc\_M10 encompassing features of the PC state. PGCNA is based on initial  
376 radical edge reduction for all correlated genes (n=3 connections per gene retained), hub  
377 nodes emerge by virtue of being amongst the most correlated partners of many other  
378 genes. As a hub gene, *PRDM1* was highly interconnected. Its immediate neighbours included  
379 other core genes of the PC state, such as *IRF4*, *XBP1* and *SLAMF7(CD319)* (Figure 6C). *MCL1*  
380 was also an immediate neighbour of *PRDM1*. *MCL1* itself was not a hub gene in the network  
381 but its immediate most correlated gene neighbours included both *PRDM1* and *XBP1* (Figure  
382 6D). Thus, the expression of *MCL1* correlates with the key transcriptional regulators of the

383 PB/PC state in ex vivo peripheral blood PBs. We conclude therefore that expression of *MCL1*  
384 in PBs before APRIL exposure is consistent with the physiological state of peripheral blood  
385 PBs prior to entry into survival niche conditions.

386

387 *The APRIL response includes regulation of cell adhesion and metabolism genes*

388 A dominant feature of the APRIL response lies in the regulation of the NFκB pathway, and  
389 amongst the most significantly induced genes were several related to adhesion and  
390 metabolism including *ICAM1*, *NINJ1*, *NAMPT* and *SQSTM1*. In fact, these genes also belong  
391 to the Hallmark signature of TNFA signaling via NFκB and are thus consistent with a  
392 canonical response to TNFSF/TNFRSF interaction. *ICAM1* and *NINJ1* are both involved in the  
393 process of cell adhesion, and ICAM1 interactions via stromal fibroblasts have been recently  
394 highlighted as synergising with APRIL signals to support PC survival via PI3K signaling and  
395 FOXO phosphorylation.(27) While APRIL signaling was independently able to sustain  
396 activation of this pathway in our model, regulation of ICAM1 would nonetheless provide the  
397 potential for sustained signaling. We therefore examined ICAM1 expression following APRIL  
398 stimulation by flow cytometry, consistent with the gene expression data ICAM1 expression  
399 was significantly upregulated on the surface of PCs within 24h of APRIL stimulation (Figure  
400 7A and B).

401 Metabolic regulation and autophagy are important factors in PC longevity, and *SQSTM1*  
402 expression is both a feature of the PB/PC state and induced following APRIL exposure.  
403 *SQSTM1* is a multifunctional protein with roles in selective autophagy, metabolic regulation  
404 via mTORC1 and regulation of the NFκB pathway. We found that *SQSTM1* was both robustly  
405 induced in expression and was phosphorylated in differentiating PBs, following APRIL  
406 stimulation. Phosphorylation of *SQSTM1* was observed with antibody specific to

407 Thr269/Serine272 a target site for p38,(29) which suggests that SQSTM1 may provide a  
408 point of integration for APRIL induced signals in PBs (Figure 7C and D). Thus, the control of  
409 genes linked to the canonical TNFSF/TNRSF response pathway along with the downstream  
410 regulation of modules related to MYC and OCT2 point to a diverse impact of APRIL on PB/PC  
411 biology which together provide several pathways through which survival may be sustained.

## 412 Discussion

413 The generation and maintenance of long-lived PCs from transitional PB populations is  
414 dependent in vivo on the migration of a PB to micro-anatomical niches that provide suitable  
415 signals for survival.(4) It is postulated that once localized to such a niche the PC must retain  
416 the capacity to reside in and respond to the niche signals provided, or be displaced by newly  
417 generated ASCs. Such competition potentially limits PC longevity, and both extrinsic niche  
418 factors and intrinsic features of the differentiating ASC may contribute to determine  
419 competitive fitness.(1) However understanding how niche signals impact on the maturation  
420 of PCs and the signaling pathways employed has been limited by intrinsic features of PC  
421 biology including limited cell number and inaccessible anatomical location in particular in  
422 the context of human PCs.

423 Amongst the niche signals that have been defined as important for in vivo long lived PC  
424 generation in vivo are signals delivered by the TNFSF member APRIL.(30) Here we have used  
425 an in vitro model system to address the signaling and gene regulatory response in human  
426 PBs induced by encounter with APRIL. Our data demonstrate that the acute signaling  
427 responses are diverse, including activation of canonical NF $\kappa$ B, p38 and JNK MAPkinase as  
428 well as AKT. This pattern shows considerable overlap to signaling responses induced by  
429 BAFF in B-cells and recapitulates the pattern of signaling demonstrated for BCMA activation  
430 in the context of forced over-expression in cell line models.(7, 18) This confirms that a broad  
431 diversity of signaling is induced by this factor in differentiating primary human ASCs. APRIL  
432 also activates the ERK MAPkinase pathway but with relatively delayed kinetics when  
433 compared to the response to the chemokine SDF1 (CXCL12).(6) Such differences in  
434 upstream signalling also propagate into distinct kinetics of IEG response, and downstream  
435 transcriptional responses. In a reductionist model of niche homing the response to the

436 chemoattractant SDF1 would precede responses to signals linked to niche residence such as  
437 APRIL. Niche size can be understood in terms of signaling microdomains with diffusion and  
438 consumption combining to limit the range over which particular niche signals may act.(31)  
439 Combining temporal and spatial sequences of niche signals with differential downstream  
440 pathway activation provides the potential to encode complex gene regulatory responses  
441 which may in turn contribute to differences in functional specialization and fitness of  
442 individual PCs.

443 The precise pathways responsible for signal propagation at the plasma membrane following  
444 exposure to APRIL remain to be determined. We confirmed the observation of Laurent et al.  
445 that  $\gamma$ -secretase inhibition maximises surface BCMA expression.(10) This increase in BCMA  
446 expression translated into enhanced APRIL induced survival responses. In conjunction with  
447 the existing literature it is therefore most likely that the dominant receptor for the APRIL  
448 response in this model is indeed BCMA. While TACI expression is not substantially impacted  
449 by  $\gamma$ -secretase treatment it is expressed at low levels in PBs, and thus a contribution to  
450 signal propagation cannot be excluded (data not shown). Future studies will be needed to  
451 address the membrane proximal signaling events that lead to the activation of the diverse  
452 downstream pathways. Regulation of AKT phosphorylation and by inference activation of  
453 PI3K is of particular interest. We note for example that APRIL signaling preferentially  
454 maintains CD19 expression amongst the differentiating PCs, and that CD19 has been  
455 identified as a hub for PI3K activation in the B-lineage.(32)

456 Our analysis shows that the APRIL induced signaling pathway activation propagates into  
457 successive waves of gene regulation. These follow a classical pattern of immediate early,  
458 delayed early and secondary response gene regulation.(33) The modules of genes that  
459 correspond to immediate and delayed early responses show a high degree of overlap to

460 patterns of gene regulation identified in the TNFA signaling hallmark gene sets (Broad  
461 GSEA).(34) The most immediate responses are the control of co-ordinated modules of genes  
462 shared with the TNF response that have been attributed to NFκB independent signaling, and  
463 most likely relate to MAPkinase pathway induction. These are closely followed by typical  
464 NFκB response modules which include many of the negative feedback regulators typically  
465 associated with canonical NFκB pathway activation and including miR genes such as  
466 *MIR3142HG*, which is the host gene for miR-146a, a negative regulator of NFκB pathway  
467 activation.(35) An essential role for miR-155 in sustaining murine PB proliferation and class-  
468 switched antibody production has been recently reported,(36) and the induction of  
469 *MIR155HG* as human PBs mature in response to APRIL suggests that an important role for  
470 this miRNA continues into the quiescent PC state.

471 As the gene regulatory response to APRIL propagates, the initial immediate early and NFκB  
472 target genes are repressed, consistent with efficient negative feedback regulation of the  
473 response. At the same time the propagation of the signal into secondary response genes  
474 focuses in particular on ribosome, MYC and OCT2 related gene signatures. The secondary  
475 response modules induced by APRIL do include selected elements related to direct control  
476 of cell cycle for example *CCND2* and *CDK4*, but enrichment of cell cycle related signatures in  
477 large part reflects coordinated induction of multiple proteasome subunit genes. This argues  
478 that while APRIL signals do impact on cell cycle related gene expression, the secondary  
479 response modules are principally related to ribosome function, RNA processing and  
480 biogenesis and hence to cell growth rather than cell proliferation per se.

481 In mice *MCL1* has been shown to be essential for PC survival, and regulated independently  
482 of BLIMP1 during PC differentiation.(15) In human PBs, whether in vitro generated or in vivo  
483 derived, we find that *MCL1* mRNA expression is closely correlated with core features of the

484 PC state. In murine PCs expression of *MCL1* is reduced in bone marrow but not splenic PC  
485 after genetic deletion of *BCMA*.(15) In keeping with this, we find that APRIL enhances the  
486 expression of both *BCL2* and *MCL1* in human PBs. However, as *MCL1* is already abundantly  
487 expressed its further induction is only modest over the time course tested. The in vitro data  
488 are consistent with the pattern of *MCL1* expression in single cell transcriptomic data of  
489 peripheral blood B-cells and PBs in which *MCL1* correlates with other core features of the PC  
490 state. As our analyses is focused on the earliest response of PBs to APRIL the data do not  
491 exclude a greater role in maintaining expression of *MCL1* as long-lived PCs are subsequently  
492 established. However, it is likely that additional pathways contribute to the survival  
493 advantage conferred by APRIL during the initial PB/PC window. Amongst the most  
494 substantially induced genes over the time course are transcription factors such as *ATF3*,  
495 adhesion molecule *ICAM1*, and metabolism and autophagy related genes such as *NAMPT*  
496 and *SQSTM1*.

497 In a recent study it has been argued that long-lived (memory) PC survival depends on two  
498 key pathways, activation of NF $\kappa$ B via APRIL/BCMA and activation of the PI3K/AKT/FOXO  
499 pathway in response to integrin binding to ICAM1/VCAM1 on stromal cells.(27) Human PCs  
500 both in vitro generated and ex vivo derived have the potential for survival without contact  
501 dependent help from stromal cells, although such stromal cells may provide additional  
502 support.(5) Here we find that APRIL itself can induce phosphorylation of AKT consistent with  
503 PI3K pathway activation independent of a stromal cell contact. Additionally, amongst the  
504 most significantly induced genes following APRIL signaling in human PBs is *ICAM1* and  
505 corresponds with enhanced surface ICAM1 expression upon differentiation. This provides  
506 the potential means to support homotypic adhesion. Cohesive masses of PCs are a  
507 characteristic feature in inflammation and in PC neoplasia, for example in



508 plasmacytomas,(37) arguing that homotypic adhesion and signaling can act as contributors  
509 to PC survival in vivo. Induction of ICAM1 by APRIL or downstream of related NFκB pathway  
510 activation provides one means through which such signaling may substitute for a stromal  
511 contact dependent pathway. However, while this may provide one mechanism the diverse  
512 signaling and gene regulator response induced by APRIL argue that multiple pathways are  
513 likely in sum to contribute to the prosurvival signal delivered by this niche factor at the PB to  
514 PC transition.

515

### 516 [Acknowledgements](#)

517 This work was supported by Cancer Research UK program grant (C7845/A17723 and  
518 C7845/A29212), and Cancer Research accelerator award (C355/A26819).

519 We thank Ulf Klein for critical review of the manuscript.

520

521

## 522 References

- 523 1. Robinson, M. J., R. H. Webster, and D. M. Tarlinton. 2020. How intrinsic and extrinsic  
524 regulators of plasma cell survival might intersect for durable humoral immunity.  
525 *Immunol Rev* 296:87-103.
- 526 2. Dang, V. D., E. Hilgenberg, S. Ries, P. Shen, and S. Fillatreau. 2014. From the  
527 regulatory functions of B cells to the identification of cytokine-producing plasma cell  
528 subsets. *Curr Opin Immunol* 28:77-83.
- 529 3. Care, M. A., S. J. Stephenson, N. A. Barnes, I. Fan, A. Zougman, Y. M. El-Sherbiny, E.  
530 M. Vital, D. R. Westhead, R. M. Tooze, and G. M. Doody. 2016. Network Analysis  
531 Identifies Proinflammatory Plasma Cell Polarization for Secretion of ISG15 in Human  
532 Autoimmunity. *J Immunol* 197:1447-1459.
- 533 4. Lindquist, R. L., R. A. Niesner, and A. E. Hauser. 2019. In the Right Place, at the Right  
534 Time: Spatiotemporal Conditions Determining Plasma Cell Survival and Function.  
535 *Front Immunol* 10:788.
- 536 5. Cocco, M., S. Stephenson, M. A. Care, D. Newton, N. A. Barnes, A. Davison, A.  
537 Rawstron, D. R. Westhead, G. M. Doody, and R. M. Tooze. 2012. In vitro generation  
538 of long-lived human plasma cells. *J Immunol* 189:5773-5785.
- 539 6. Stephenson, S., M. A. Care, I. Fan, A. Zougman, D. R. Westhead, G. M. Doody, and R.  
540 M. Tooze. 2019. Growth Factor-like Gene Regulation Is Separable from Survival and  
541 Maturation in Antibody-Secreting Cells. *J Immunol* 202:1287-1300.
- 542 7. Rickert, R. C., J. Jellusova, and A. V. Miletic. 2011. Signaling by the tumor necrosis  
543 factor receptor superfamily in B-cell biology and disease. *Immunol Rev* 244:115-133.
- 544 8. Bossen, C., and P. Schneider. 2006. BAFF, APRIL and their receptors: structure,  
545 function and signaling. *Semin Immunol* 18:263-275.
- 546 9. Mackay, F., and P. Schneider. 2009. Cracking the BAFF code. *Nature reviews.*  
547 *Immunology* 9:491-502.
- 548 10. Laurent, S. A., F. S. Hoffmann, P. H. Kuhn, Q. Cheng, Y. Chu, M. Schmidt-Supprian, S.  
549 M. Hauck, E. Schuh, M. Krumbholz, H. Rubsamen, J. Wangren, M. Khademi, T.  
550 Olsson, T. Alexander, F. Hiepe, H. W. Pfister, F. Weber, D. Jenne, H. Wekerle, R.  
551 Hohlfeld, S. F. Lichtenthaler, and E. Meinel. 2015. gamma-Secretase directly sheds the  
552 survival receptor BCMA from plasma cells. *Nat Commun* 6:7333.
- 553 11. O'Connor, B. P., V. S. Raman, L. D. Erickson, W. J. Cook, L. K. Weaver, C. Ahonen, L. L.  
554 Lin, G. T. Mantchev, R. J. Bram, and R. J. Noelle. 2004. BCMA is essential for the  
555 survival of long-lived bone marrow plasma cells. *The Journal of experimental*  
556 *medicine* 199:91-98.
- 557 12. Benson, M. J., S. R. Dillon, E. Castigli, R. S. Geha, S. Xu, K. P. Lam, and R. J. Noelle.  
558 2008. Cutting edge: the dependence of plasma cells and independence of memory B  
559 cells on BAFF and APRIL. *J Immunol* 180:3655-3659.
- 560 13. Vincent, F. B., E. F. Morand, P. Schneider, and F. Mackay. 2014. The BAFF/APRIL  
561 system in SLE pathogenesis. *Nat Rev Rheumatol* 10:365-373.
- 562 14. Samy, E., S. Wax, B. Huard, H. Hess, and P. Schneider. 2017. Targeting BAFF and  
563 APRIL in systemic lupus erythematosus and other antibody-associated diseases. *Int*  
564 *Rev Immunol* 36:3-19.
- 565 15. Peperzak, V., I. Vikstrom, J. Walker, S. P. Glaser, M. LePage, C. M. Coquery, L. D.  
566 Erickson, K. Fairfax, F. Mackay, A. Strasser, S. L. Nutt, and D. M. Tarlinton. 2013. Mcl-  
567 1 is essential for the survival of plasma cells. *Nat Immunol* 14:290-297.

- 568 16. Tai, Y. T., C. Acharya, G. An, M. Moschetta, M. Y. Zhong, X. Feng, M. Cea, A. Cagnetta,  
569 K. Wen, H. van Eenennaam, A. van Elsas, L. Qiu, P. Richardson, N. Munshi, and K. C.  
570 Anderson. 2016. APRIL and BCMA promote human multiple myeloma growth and  
571 immunosuppression in the bone marrow microenvironment. *Blood* 127:3225-3236.
- 572 17. Moreaux, J., E. Legouffe, E. Jourdan, P. Quittet, T. Reme, C. Lugagne, P. Moine, J. F.  
573 Rossi, B. Klein, and K. Tarte. 2004. BAFF and APRIL protect myeloma cells from  
574 apoptosis induced by interleukin 6 deprivation and dexamethasone. *Blood* 103:3148-  
575 3157.
- 576 18. Hatzoglou, A., J. Roussel, M. F. Bourgeade, E. Rogier, C. Madry, J. Inoue, O. Devergne,  
577 and A. Tsapis. 2000. TNF receptor family member BCMA (B cell maturation)  
578 associates with TNF receptor-associated factor (TRAF) 1, TRAF2, and TRAF3 and  
579 activates NF-kappa B, elk-1, c-Jun N-terminal kinase, and p38 mitogen-activated  
580 protein kinase. *J Immunol* 165:1322-1330.
- 581 19. Keats, J. J., R. Fonseca, M. Chesi, R. Schop, A. Baker, W. J. Chng, S. Van Wier, R.  
582 Tiedemann, C. X. Shi, M. Sebag, E. Braggio, T. Henry, Y. X. Zhu, H. Fogle, T. Price-  
583 Troska, G. Ahmann, C. Mancini, L. A. Brents, S. Kumar, P. Greipp, A. Dispenzieri, B.  
584 Bryant, G. Mulligan, L. Bruhn, M. Barrett, R. Valdez, J. Trent, A. K. Stewart, J. Carpten,  
585 and P. L. Bergsagel. 2007. Promiscuous mutations activate the noncanonical NF-  
586 kappaB pathway in multiple myeloma. *Cancer Cell* 12:131-144.
- 587 20. Annunziata, C. M., R. E. Davis, Y. Demchenko, W. Bellamy, A. Gabrea, F. Zhan, G.  
588 Lenz, I. Hanamura, G. Wright, W. Xiao, S. Dave, E. M. Hurt, B. Tan, H. Zhao, O.  
589 Stephens, M. Santra, D. R. Williams, L. Dang, B. Barlogie, J. D. Shaughnessy, Jr., W. M.  
590 Kuehl, and L. M. Staudt. 2007. Frequent engagement of the classical and alternative  
591 NF-kappaB pathways by diverse genetic abnormalities in multiple myeloma. *Cancer*  
592 *Cell* 12:115-130.
- 593 21. Demchenko, Y. N., O. K. Glebov, A. Zingone, J. J. Keats, P. L. Bergsagel, and W. M.  
594 Kuehl. 2010. Classical and/or alternative NF-kappaB pathway activation in multiple  
595 myeloma. *Blood* 115:3541-3552.
- 596 22. Doody, G. M., S. Stephenson, and R. M. Tooze. 2006. BLIMP-1 is a target of cellular  
597 stress and downstream of the unfolded protein response. *Eur J Immunol* 36:1572-  
598 1582.
- 599 23. Arumugakani, G., S. J. Stephenson, D. J. Newton, A. Rawstron, P. Emery, G. M.  
600 Doody, D. McGonagle, and R. M. Tooze. 2017. Early Emergence of CD19-Negative  
601 Human Antibody-Secreting Cells at the Plasmablast to Plasma Cell Transition. *J*  
602 *Immunol* 198:4618-4628.
- 603 24. Care, M. A., D. R. Westhead, and R. M. Tooze. 2018. Defining common principles of  
604 gene co-expression refines molecular stratification in cancer. *bioRxiv*:bioRxiv 372557.
- 605 25. Croote, D., S. Darmanis, K. C. Nadeau, and S. R. Quake. 2018. High-affinity allergen-  
606 specific human antibodies cloned from single IgE B cell transcriptomes. *Science*  
607 362:1306-1309.
- 608 26. Nguyen, D. C., S. Garimalla, H. Xiao, S. Kyu, I. Albizua, J. Galipeau, K. Y. Chiang, E. K.  
609 Waller, R. Wu, G. Gibson, J. Roberson, F. E. Lund, T. D. Randall, I. Sanz, and F. E. Lee.  
610 2018. Factors of the bone marrow microniche that support human plasma cell  
611 survival and immunoglobulin secretion. *Nat Commun* 9:3698.
- 612 27. Cornelis, R., S. Hahne, A. Taddeo, G. Petkau, D. Malko, P. Durek, M. Thiem, L.  
613 Heiberger, L. Peter, E. Mohr, C. Klaeden, K. Tokoyoda, F. Siracusa, B. F. Hoyer, F.  
614 Hiepe, M. F. Mashreghi, F. Melchers, H. D. Chang, and A. Radbruch. 2020. Stromal

- 615 Cell-Contact Dependent PI3K and APRIL Induced NF-kappaB Signaling Prevent  
616 Mitochondrial- and ER Stress Induced Death of Memory Plasma Cells. *Cell Rep*  
617 32:107982.
- 618 28. Care, M. A., D. R. Westhead, and R. M. Tooze. 2019. Parsimonious Gene Correlation  
619 Network Analysis (PGCNA): a tool to define modular gene co-expression for refined  
620 molecular stratification in cancer. *NPJ Syst Biol Appl* 5:13.
- 621 29. Sanchez-Martin, P., T. Saito, and M. Komatsu. 2019. p62/SQSTM1: 'Jack of all trades'  
622 in health and cancer. *FEBS J* 286:8-23.
- 623 30. Benson, M. J., S. R. Dillon, E. Castigli, R. S. Geha, S. Xu, K. P. Lam, and R. J. Noelle.  
624 2008. Cutting edge: the dependence of plasma cells and independence of memory B  
625 cells on BAFF and APRIL. *Journal of Immunology* 180:3655-3659.
- 626 31. Oyler-Yaniv, A., J. Oyler-Yaniv, B. M. Whitlock, Z. Liu, R. N. Germain, M. Huse, G.  
627 Altan-Bonnet, and O. Krichevsky. 2017. A Tunable Diffusion-Consumption  
628 Mechanism of Cytokine Propagation Enables Plasticity in Cell-to-Cell Communication  
629 in the Immune System. *Immunity* 46:609-620.
- 630 32. Keppler, S. J., F. Gasparrini, M. Burbage, S. Aggarwal, B. Frederico, R. S. Geha, M.  
631 Way, A. Bruckbauer, and F. D. Batista. 2015. Wiskott-Aldrich Syndrome Interacting  
632 Protein Deficiency Uncovers the Role of the Co-receptor CD19 as a Generic Hub for  
633 PI3 Kinase Signaling in B Cells. *Immunity* 43:660-673.
- 634 33. Avraham, R., and Y. Yarden. 2011. Feedback regulation of EGFR signalling: decision  
635 making by early and delayed loops. *Nat Rev Mol Cell Biol* 12:104-117.
- 636 34. Subramanian, A., P. Tamayo, V. K. Mootha, S. Mukherjee, B. L. Ebert, M. A. Gillette,  
637 A. Paulovich, S. L. Pomeroy, T. R. Golub, E. S. Lander, and J. P. Mesirov. 2005. Gene  
638 set enrichment analysis: a knowledge-based approach for interpreting genome-wide  
639 expression profiles. *Proc Natl Acad Sci U S A* 102:15545-15550.
- 640 35. O'Connell, R. M., D. S. Rao, and D. Baltimore. 2012. microRNA regulation of  
641 inflammatory responses. *Annu Rev Immunol* 30:295-312.
- 642 36. Arbore, G., T. Henley, L. Biggins, S. Andrews, E. Vigorito, M. Turner, and R. Leyland.  
643 2019. MicroRNA-155 is essential for the optimal proliferation and survival of  
644 plasmablast B cells. *Life Sci Alliance* 2.
- 645 37. Soutar, R., H. Lucraft, G. Jackson, A. Reece, J. Bird, E. Low, D. Samson, U. K. M. F.  
646 Working Group of the, H. British Committee for Standards in, and H. British Society  
647 for. 2004. Guidelines on the diagnosis and management of solitary plasmacytoma of  
648 bone and solitary extramedullary plasmacytoma. *Clin Oncol (R Coll Radiol)* 16:405-  
649 413.
- 650

651

652 [Figure Legends](#)

653 [Figure 1. APRIL and  \$\gamma\$ -secretase inhibition support in vitro PC differentiation and survival. \(A\)](#)

654 APRIL dose response showing recovered cell number at day 13 of in vitro culture, y-axis -

655 fraction of cells recovered at day 13 (D13) per input cell at day 6 (D6), x-axis - concentration

656 of multimeric APRIL (ng/ml) from day 6 (all conditions included a standard dose of IL6 and

657 IL21), data are shown for 3 donors (symbols). (B) Representative flow cytometry plots for

658 selected antigens. Left panel - phenotype at day 6, before the addition of APRIL. Right panel

659 - phenotype at day 13 following culture in IL6, IL21 and APRIL. Results are shown for each

660 APRIL concentration equivalent to part (A) and antigens highlighted above each panel. (C)

661 Impact of  $\gamma$ -secretase inhibition (GSI) on BCMA expression. Left panel - representative flow

662 cytometry data for surface BCMA expression\_at day 7 following treatment with indicated

663 conditions. Right panel -  $\Delta$ MFI ( $\times 10^3$ ) for BCMA expression against isotype control. Data are

664 shown—for 4 donors (paired t-test: \*  $p < 0.05$ ). (D) Impact of APRIL treatment on BCMA

665 expression in the presence or absence of GSI. Left panel - representative flow cytometry

666 data for surface BCMA expression\_at day 13 following treatment with indicated conditions.

667 Right panel -  $\Delta$ MFI ( $\times 10^3$ ) for BCMA expression against isotype control. Data shown are for 3

668 donors (RM one-way ANOVA test: \*  $p < 0.05$ ). (E) Cell number recovered after APRIL

669 stimulation from day 6 to day 13 of in vitro culture under conditions indicated (x-axis), y-axis

670 - fraction of cells recovered at day 13 (D13) per input cell at day 6 (D6) (RM one-way ANOVA

671 test: \*  $p < 0.05$ , \*\*  $p < 0.01$ , \*\*\*  $p < 0.001$ ). (F) Percentage of CD38<sup>+</sup>/CD138<sup>+</sup> cells observed at

672 day 13 in samples cultured as in (E). (G) Representative scatter plots of CD38 vs CD138

673 expression of a single donor at day 13, with culture conditions indicated above each panel.

674 Data shown in E & F are representative of 6 donors. In parts C-E, control conditions are

675 media plus standard dose of IL6 and IL21. Individual donors are indicated by unique symbols  
676 which are consistent across all figures.

677

678 **Figure 2. APRIL supports ex vivo PB maturation. (A)** Comparison of cell recovery after 14  
679 days of in vitro culture for ex vivo BCMA+ PBs isolated at day 7 after influenza vaccination  
680 cultured in IL6 and either IFN $\alpha$  or APRIL/GSI conditions (x-axis), y-axis – PCs at day 14 (D14)  
681 per input cell at day 0 (D0) (paired t-test \*  $p < 0.05$ ). Data shown are for 5 donors (symbols).  
682 **(B)** Representative phenotypes of cells isolated ex vivo at day 7 after influenza vaccination  
683 left panels, or after 14 days of in vitro culture (equivalent to day 21 post vaccination) in IL6  
684 with IFN $\alpha$  (middle) or APRIL/GSI (right) panels. Scatter plots from top to bottom show  
685 CD19/CD20, CD27/CD38 and CD38/CD138 as indicated. **(C)** Differential expression for  
686 antigens assessed in (B), shown in order CD19, CD27, CD38 and CD138 from top to bottom  
687 as  $\Delta$ MFI ( $\times 10^3$  or  $\times 10^4$  as indicated) against isotype control (y-axis) for IFN $\alpha$  (left) or  
688 APRIL/GSI (right) (x-axis). Each donor is identified with a unique symbol (paired t-test: ns -  
689 not significant, \*\*  $p < 0.01$ , \*\*\*  $p < 0.001$ ). Data shown are for 8 donors. **(D and E)** Equivalent  
690 immunoglobulin secretion is supported by either IFN $\alpha$  or APRIL/GSI conditions.  
691 Representative ELISpot results for two independent donors from ex vivo isolated cells at day  
692 7 post influenza vaccination (left panels) or after 14 days of in vitro culture with IL6 and  
693 either IFN $\alpha$  (middle) or APRIL/GSI (right) panels, equivalent to day 21 post influenza  
694 vaccination (D) and quantitation (E) shown for 5 donors.

695

696 **Figure 3. MAPkinase pathway activation and immediate early gene regulation in response to**  
697 **APRIL. (A)** Time course of ERK1/2 phosphorylation induced after stimulation of day 7 PBs  
698 with APRIL. Upper panel show detection of phospho-ERK1/2 (p-ERK) after stimulation with

699 APRIL (left lanes) for the indicated time points of t= 0 (unstimulated), 5, 15, 30, 60, 120, 240  
700 and 360 minutes. Total ERK1/2 loading control is shown below. **(B)** Time course of p38  
701 phosphorylation induced by APRIL. Upper panel show detection of phospho-p38 (p-p38)  
702 after stimulation with APRIL for the time course as in (A). Total p38 loading control is shown  
703 below. **(C)** Time course of JNK phosphorylation induced by APRIL. Upper panel show  
704 detection of phospho-JNK1/2 (p-JNK) after stimulation with APRIL for the time course as in  
705 (A). Total JNK loading control is shown below. Western blots shown in (A-C) are  
706 representative of 6 donors. **(D)** Relative kinetics of immediate early gene induction following  
707 stimulation of day 7 PBs with SDF1 (filled circles) or APRIL (filled squares). Expression of *FOS*,  
708 *FOSB* and *EGR1* is shown in order from top to bottom as average fold expression relative to  
709 t=0 normalized against housekeeping control and detected by qRT-PCR from RNA isolated at  
710 t= 0 (unstimulated), 5, 15, 30, 60, 120, 240 and 360 minutes after stimulation. Data are  
711 shown as average and standard deviation of n=2 (SDF1) and n=4 (APRIL) donors.

712

713 **Figure 4. Activation of NFκB/RELA and AKT/FOXO1 pathway by APRIL stimulation.** **(A)** Time  
714 course of IκBα phosphorylation after stimulation of day 7 PBs with APRIL compared to  
715 CD40L. Upper panel show detection of phospho-IκBα (p-IκBα) after stimulation with CD40L  
716 (left lanes) or APRIL (right lanes) for the indicated time points of t=0 (unstimulated) 5, 15  
717 and 30 minutes. Total IκBα is shown below. Stimulation leads to loss of IκBα at later time  
718 points. Data representative of 4 donors. **(B)** Nuclear localisation of RELA following APRIL  
719 stimulation. PBs at day 7 were unstimulated (t=0) or stimulated with APRIL 30, 60 and 120  
720 minutes and cytoplasmic and nuclear fractions were separated as indicated above the lanes  
721 (C and N). Samples were immunoblotted for RELA (arrow, upper panel), BLIMP1 (nuclear  
722 enriched, middle panel) and TUBULIN (cytoplasmic fraction, lower panel). Data

723 representative of 4 donors. **(C, D and E)** Activation of AKT/FOXO1 pathway after APRIL  
724 stimulation. Day-7 PB were unstimulated (t=0) or stimulated with APRIL for 5, 15, 30, 60,  
725 120, 240 and 360 minutes. Samples were probed for **(C)** AKT phospho-serine 473 (p-AKT  
726 S473) and total AKT; and **(D)** AKT phospho-threonine 308 (p-AKT T308) and total AKT; and  
727 **(E)** FOXO1 phospho-threonine 24 (p-FOXO1 T24) and total FOXO1 as indicated. Data  
728 representative of 4 donors (C & D), 5 donors (E). **(F)** Cytoplasmic and nuclear extracts (C and  
729 N above the lanes) from PBs at day 7 were unstimulated (t=0) or treated with APRIL for 120,  
730 240 or 360 minutes were blotted for FOXO1 (upper panel), FOXO3 (middle panel) and  
731 TUBULIN (lower panel). Data representative of 4 donors.

732

733 [Figure 5. The transcriptional response of PBs to APRIL stimulation.](#) **(A)** PGCNA network  
734 representation of the modular pattern of gene expression induced following APRIL  
735 stimulation of day 7 PBs over a 360 minutes time course. Network modules M1 to M16 are  
736 colour coded and are designated with a summary term derived from gene ontology and  
737 signature separation between network modules. For interactive version go to  
738 <https://mcare.link/STC-APRIL>. Visualization of top gene ontology and signature enrichments  
739 between network modules are provided in Supplemental Figure 3 and lists of module genes  
740 and ontology enrichments in Supplemental Tables 2 and 3 available online. **(B)** Overlay of  
741 gene expression z-scores for all genes in the network shown in blue (low) to red (high) Z-  
742 score color scale across the time course indicated by the arrow above the panel from left to  
743 right. Left panel unstimulated t=0 followed by expression patterns at t= 30, 60, 120 and 240  
744 minutes from left to right as indicated in the figure. Beneath each colour coded network  
745 select upregulated and down regulated modules at each time point are indicated using  
746 module number and summary term (red-upregulated module expression, blue-



747 downregulated module expression). **(C)** Summary representation of patterns of expression  
748 across all network modules as a heat map shown as module expression values derived from  
749 the top 25 genes of each module as Z-scores with a colour scale (blue (-50 low) red (+50  
750 high)). Samples and modules are separated by hierarchical clustering. Module numbers and  
751 indicative module terms are shown on the right.

752

753 [Figure 6. Network visualisation of single cell gene expression in human peripheral blood](#)

754 [PBs/PCs. \(A\)](#) Single cell gene expression data of human peripheral blood B-cells and PB/PCs  
755 were imported from Croote et al. (25) and analyzed with PGCNA to generate a network  
756 visualization of gene expression in single cell gene expression comparable to analysis to bulk  
757 expression data. Genes are identified by nodes in the network and retained direct  
758 correlations by edges. Node sizes are determined by betweenness-centrality. Network  
759 modules are color-coded and location within the network identified with matching outlines  
760 and indicative module names. For interactive version go to <https://mcare.link/STC-APRIL>.

761 Visualization of top gene ontology and signature enrichments between network modules  
762 are provided in Supplemental Figure 4 and lists of module genes and ontology enrichments

763 in Supplemental Tables 4 and 5 available online. **(B)** Clustering of cells with adaptation of  
764 PGCNA. Clusters of cells (cell-communities) were derived by carrying out a parsimonious  
765 correlation analysis on the transposed matrix used in part (A) giving 6 (C1-C6) communities.

766 Cells within each community were subsequently hierarchically clustered based on summed  
767 gene module expression values (Pearson correlations and average linkage). Summed  
768 expression values for each cell for the modules identified in (A) and mentioned in the text  
769 are shown as a heat map with indicative gene module names identified on the right. Cell-  
770 communities C1-C6 are identified above. **(C)** *PRDM1* as the hub gene of PC expression

771 module sc\_M10. The panel highlights the neighbours of *PRDM1* in the PGCNA network.  
772 Genes represented by nodes in the network are colour coded according to module  
773 membership as in (A), node size is determined by betweenness-centrality. Gene names are  
774 shown for connected hub genes (*SLAMF7* (sc\_M10 red) and *TNRFSF17* (sc\_M1\_ABC/PC royal  
775 blue)). **(D)** The nearest neighbours in the network for *MCL1*, which is not a hub gene, but  
776 includes *PRDM1* and *XBP1* amongst its four neighbours.

777

778 **Figure 7. ICAM1 and SQSTM1 expression are induced in response to APRIL in PBs. (A)**  
779 Expression of ICAM1 was detected by flow cytometry in day 7 PBs after APRIL stimulation.  
780 Upper panels show histograms of ICAM1 expression (x-axis) against unstained controls for 2  
781 representative donors with lanes from bottom of each panel in the order unstained control,  
782 t = 0 and at 3h, 6h and 24h after APRIL stimulation. **(B)** Shows  $\Delta$ MFI ( $\times 10^3$ ) of ICAM1  
783 expression against unstained control in 4 donors identified with symbols. **(C)** Expression of  
784 *SQSTM1* induced following APRIL stimulation with log expression values derived from RNA-  
785 seq expression profiling as in Figure 5, with individual donors shown with symbols. **(D)**  
786 Shows a representative Western blot of n=4 for *SQSTM1* expression after APRIL stimulation,  
787 unstimulated (t=0) or stimulated with APRIL for 5, 15, 30, 60, 120, 240 and 360 minutes  
788 shown above the lanes. Upper panel: phospho-SQSTM1; middle panel: total SQSTM1; lower  
789 panel: TUBULIN loading control.

790

791

792 [Supplemental Figure 1 \(accompanies Figure 2\). APRIL supports ex vivo PB maturation. \(A\)](#)

793 Representative phenotypes of cells isolated ex vivo at day 7 after influenza vaccination left

794 panels, or after 14 days of in vitro culture (equivalent to day 21 post vaccination) with IL6

795 and either IFN $\alpha$  (middle) or APRIL/GSI (right) panels. Scatter plots from top to bottom show

796 CD19/CD20, CD27/CD38 and CD38/CD138 as indicated for 4 individual donors. **(B and C)**

797 Representative ELISpots for influenza specific ASCs shown for cells isolated at day 7 post

798 vaccine response, or after 14 days of in vitro culture with IL6 and either IFN $\alpha$  (middle) or

799 APRIL/GSI (right) panels, equivalent to day 21 post influenza vaccination (B) and

800 quantitation (C). Numbers of cell seeded per well are shown below. Cells were incubated on

801 plates for 16-20 hours in IMDM containing either standard amounts of IL6 and IL21 (Control,

802 D7) or IL6 with either IFN $\alpha$  or APRIL/GSI (D21).

803

804 [Supplemental Figure 2 \(accompanies Figure 4 and 5\). Comparison of CD40 and APRIL from](#)

805 [day 6 of culture. \(A\)](#) Representative phenotypes for cells from two donors at day 13 of

806 culture with additional of APRIL/GSI (left panels) or soluble CD40L/GSI (right panels) along

807 with supportive cytokines IL6 and IL21. Shown are scatter plots for expression of CD38 (y-

808 axis) against CD138 (x-axis). **(B)** Upper panel recovered cell number at day 13 for PBs

809 cultured from day 6 with APRIL/GSI (left) or soluble CD40L/GSI (right) (x-axis), y-axis displays

810 day 13 (D13) cells as fraction of day 6 (D6) input. Lower panel percentage of CD38<sup>+</sup>/CD138<sup>+</sup>

811 cells at day 13 as percentage of viable cells (y-axis) for PBs cultured from day 6 with

812 APRIL/GSI (left) or soluble CD40L/GSI (right) (x-axis) along with supportive cytokines IL6 and

813 IL21. Four individual donors identified by symbols. **(C)** Expression of *MYC* mRNA induced

814 following APRIL stimulation with log expression values derived from RNA-seq expression

815 profiling as in Figure 5, with individual donors shown with symbols at the indicated time

816 points in min (x-axis). **(D)** Representative Western blot of n=4 for MYC expression in day-7  
817 PBs after APRIL stimulation, unstimulated (t=0) or stimulated with APRIL for 5, 15, 30, 60,  
818 120, 240 and 360 minutes shown above the lanes. Upper panel: MYC; lower panel: TUBULIN  
819 loading control. **(E)** MYC protein expression quantified against TUBULIN loading control  
820 across an APRIL response time course as shown in (D) for 4 individual donors identified with  
821 unique symbols. Expression is normalized to 100% for all samples based on expression for  
822 each donor at t=0.

823

824 [Supplemental Figure 3 \(accompanies Figure 5\). Gene ontology and signature enrichments](#)  
825 [for gene modules of the PB response to APRIL.](#) Heatmap of gene ontology and signature  
826 term enrichments linked to the PGCNA modules of the time course network analysis for  
827 APRIL response (signatures were pre-filtered to  $p$ -value  $<0.001$  and  $\geq 5$  and  $\leq 1000$  genes;  
828 selecting the top 15 most enriched signatures per module). For full signature enrichment  
829 lists, please see Supplemental Table 3. Modules are shown along the x-axis, and signature  
830 terms along the y-axis. Signature terms and modules are hierarchically clustered to illustrate  
831 relationships. Enrichment (red) and depletion (blue) of signatures are shown on colour scale  
832 of z-score.

833

834 [Supplemental Figure 4 \(accompanies Figure 6\). Gene ontology and signature enrichments](#)  
835 [for gene modules of the single ASC/B-cell expression network derived from Croote et al.](#)  
836 [data set.](#) Heatmap of gene ontology and signature term enrichments linked to the PGCNA  
837 modules derived from single cell gene expression in Figure 6(A) (signatures were pre-filtered  
838 to  $p$ -value  $<0.001$  and  $\geq 5$  and  $\leq 1000$  genes; selecting the top 15 most enriched signatures  
839 per module). For full signature enrichment lists, please see Supplemental Table 5. Modules

840 are shown along the x-axis, and signature terms along the y-axis. Signature terms and  
841 modules are hierarchically clustered to illustrate relationships. Enrichment (red) and  
842 depletion (blue) of signatures are shown on colour scale of z-score.

843

844

845

Figure 1

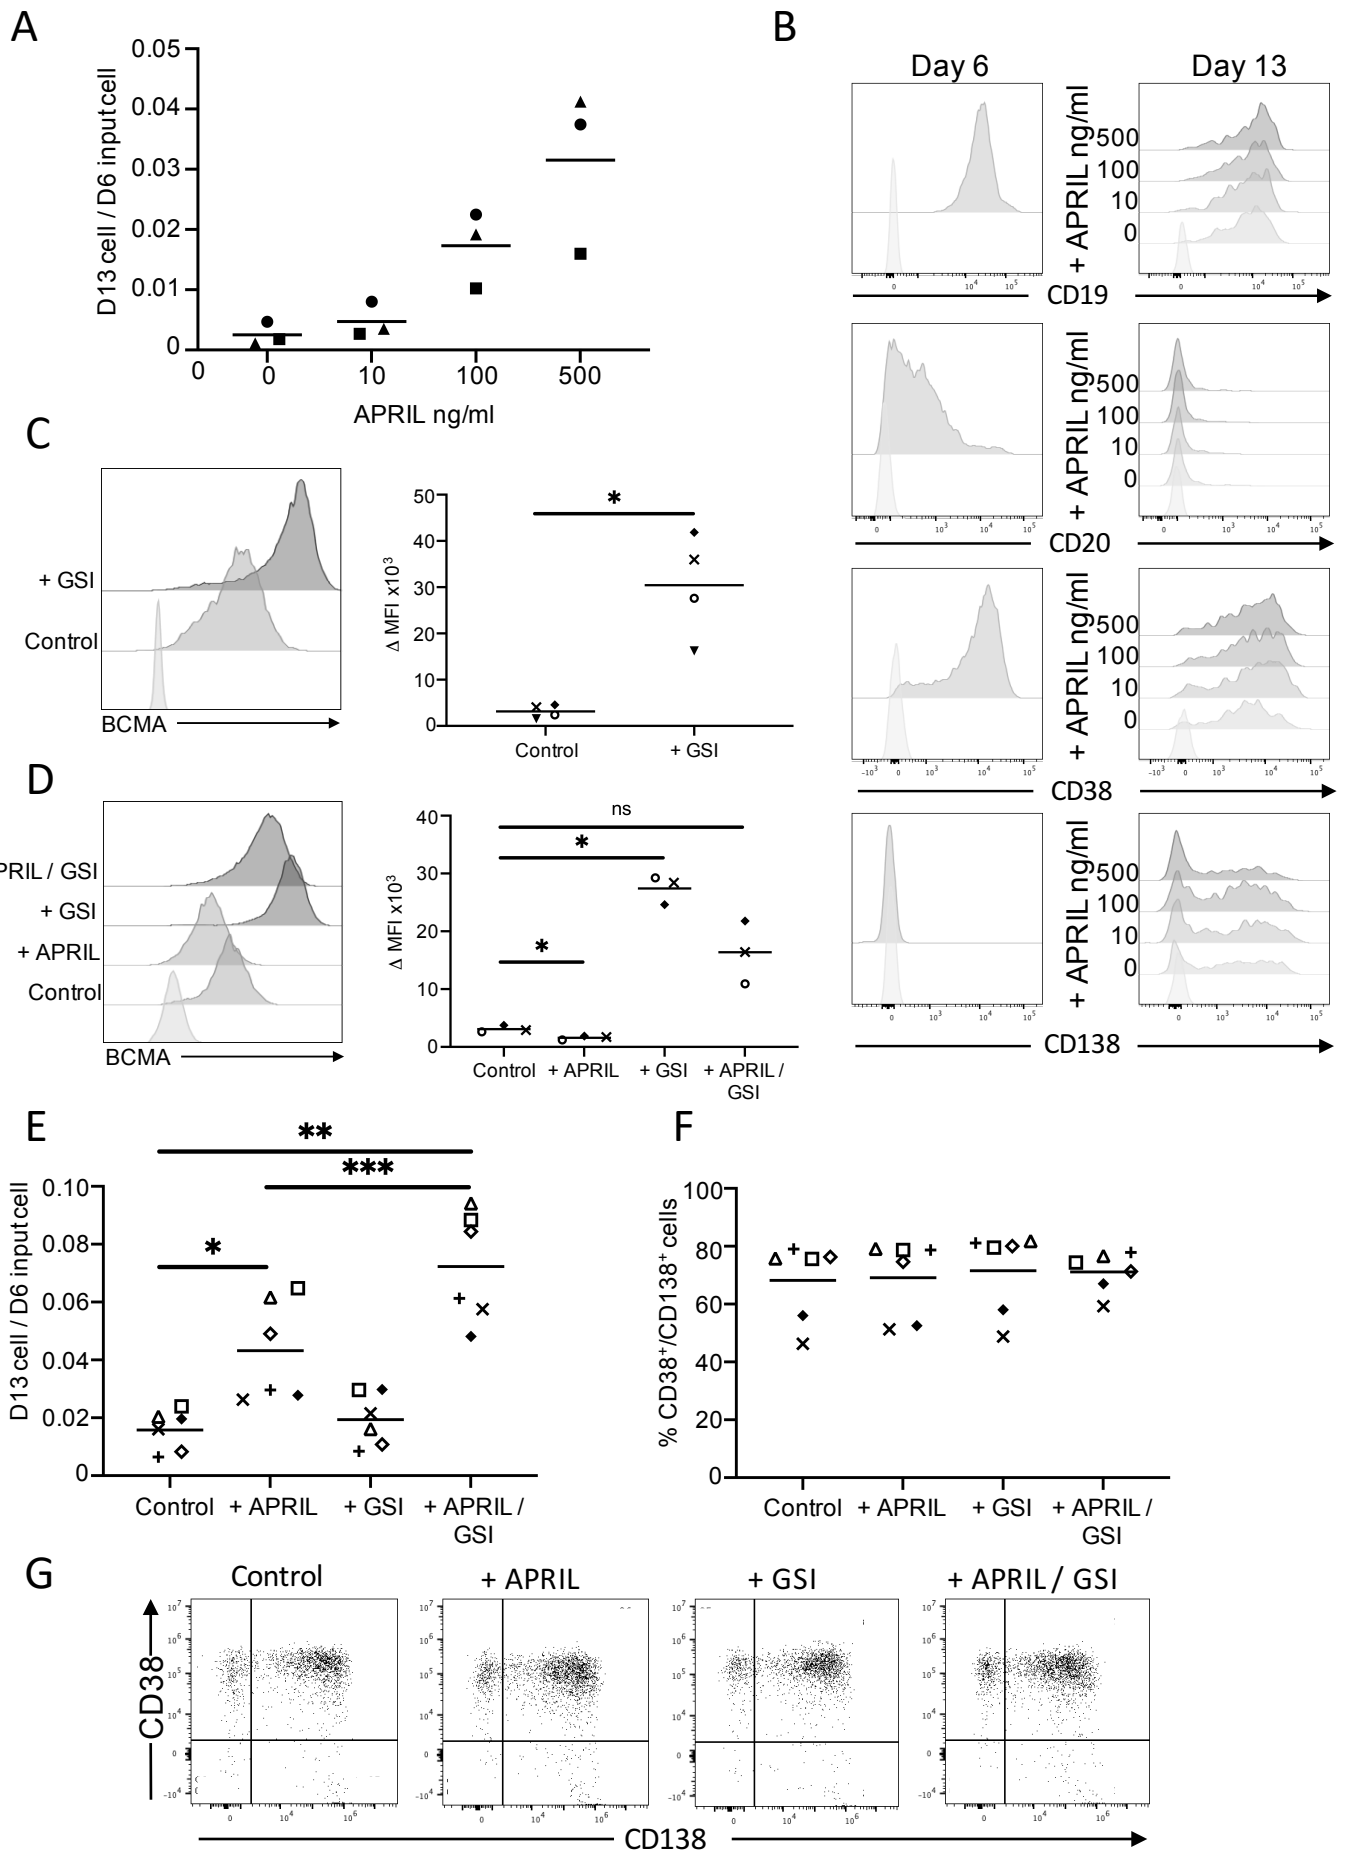

Figure 2

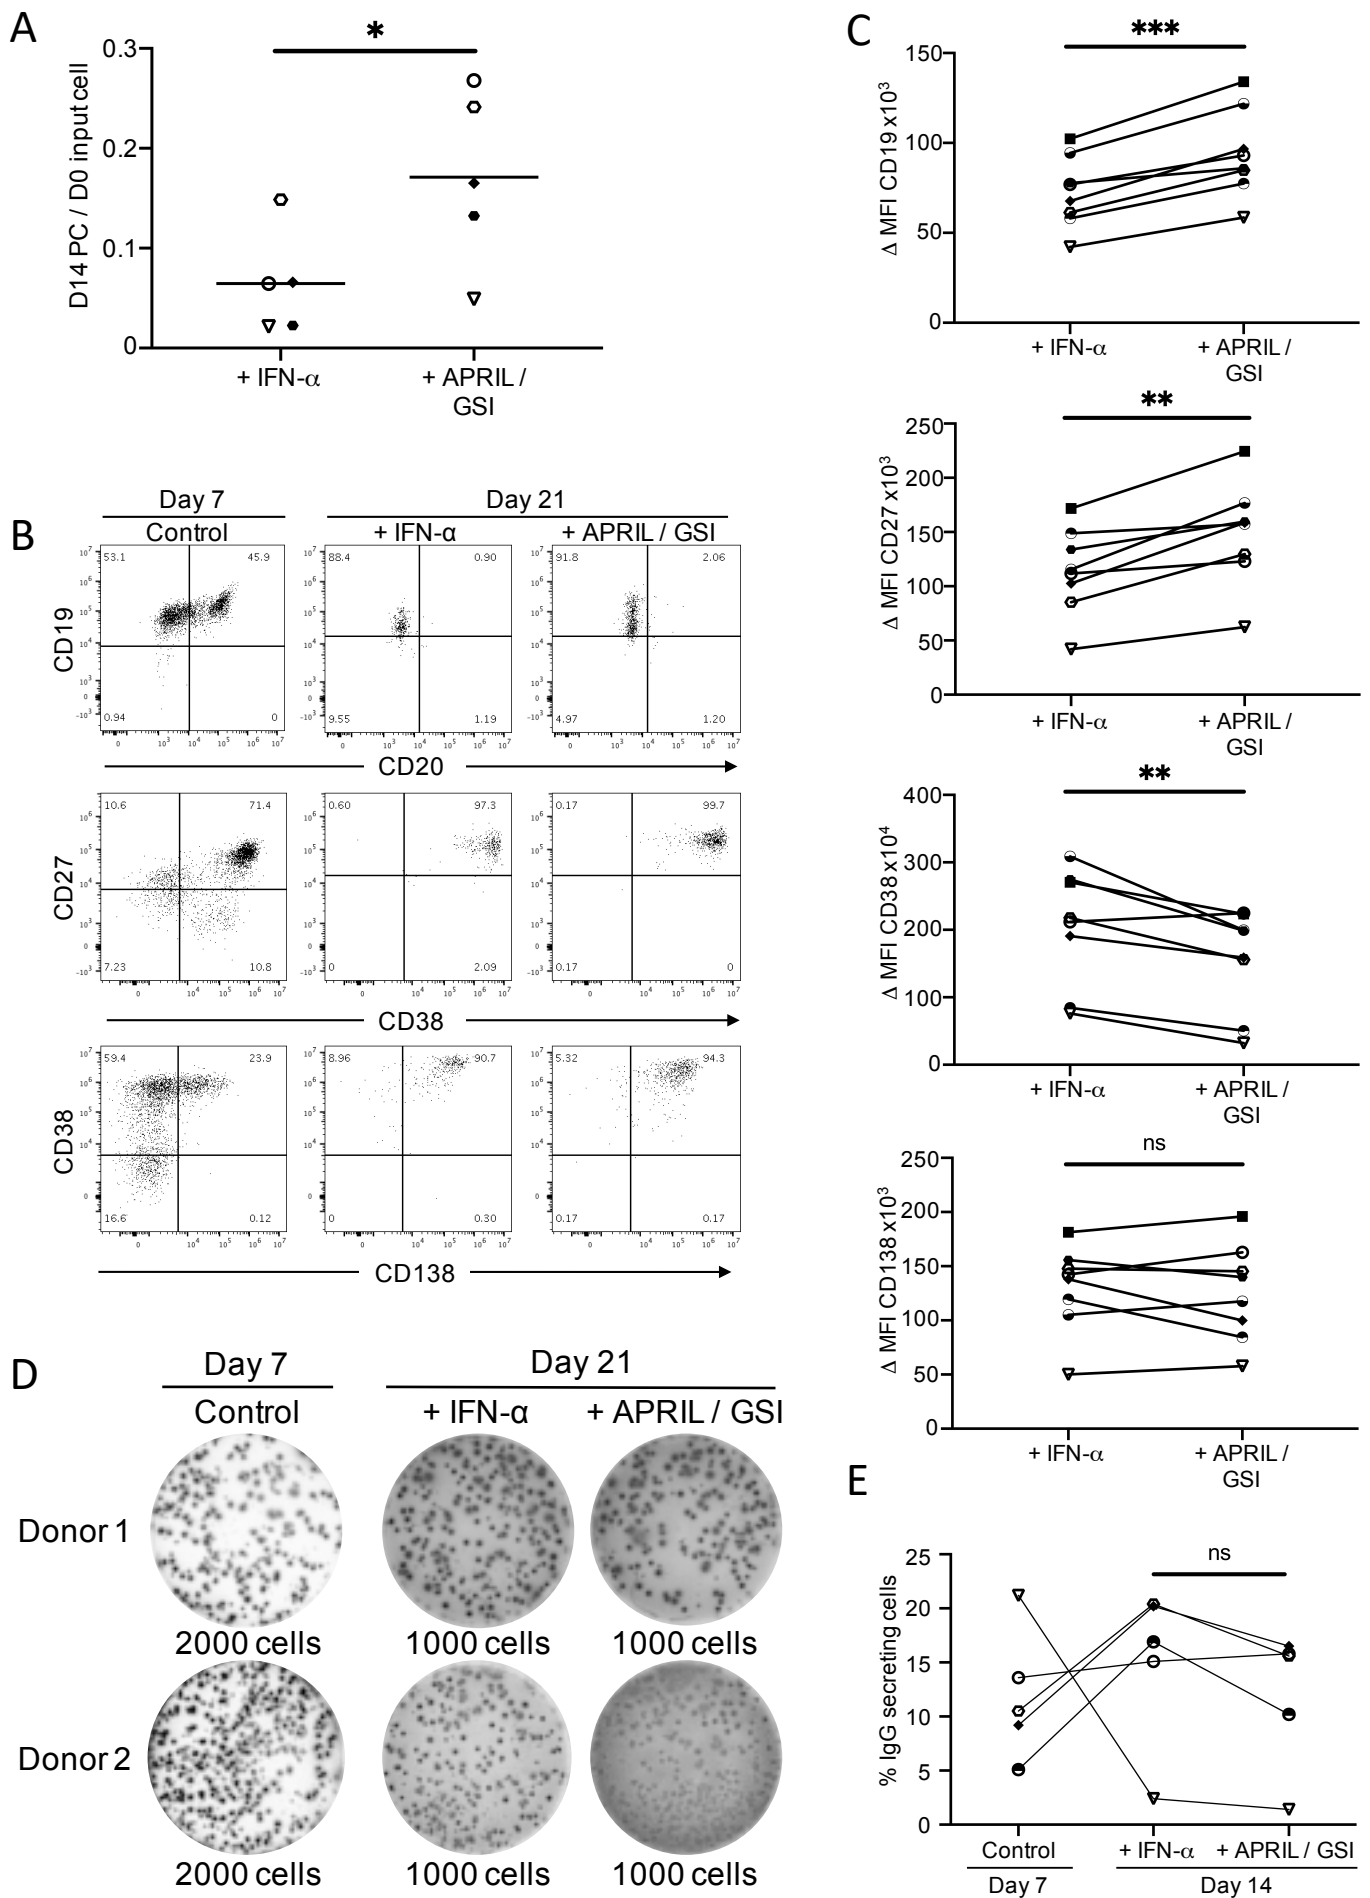

Figure 3

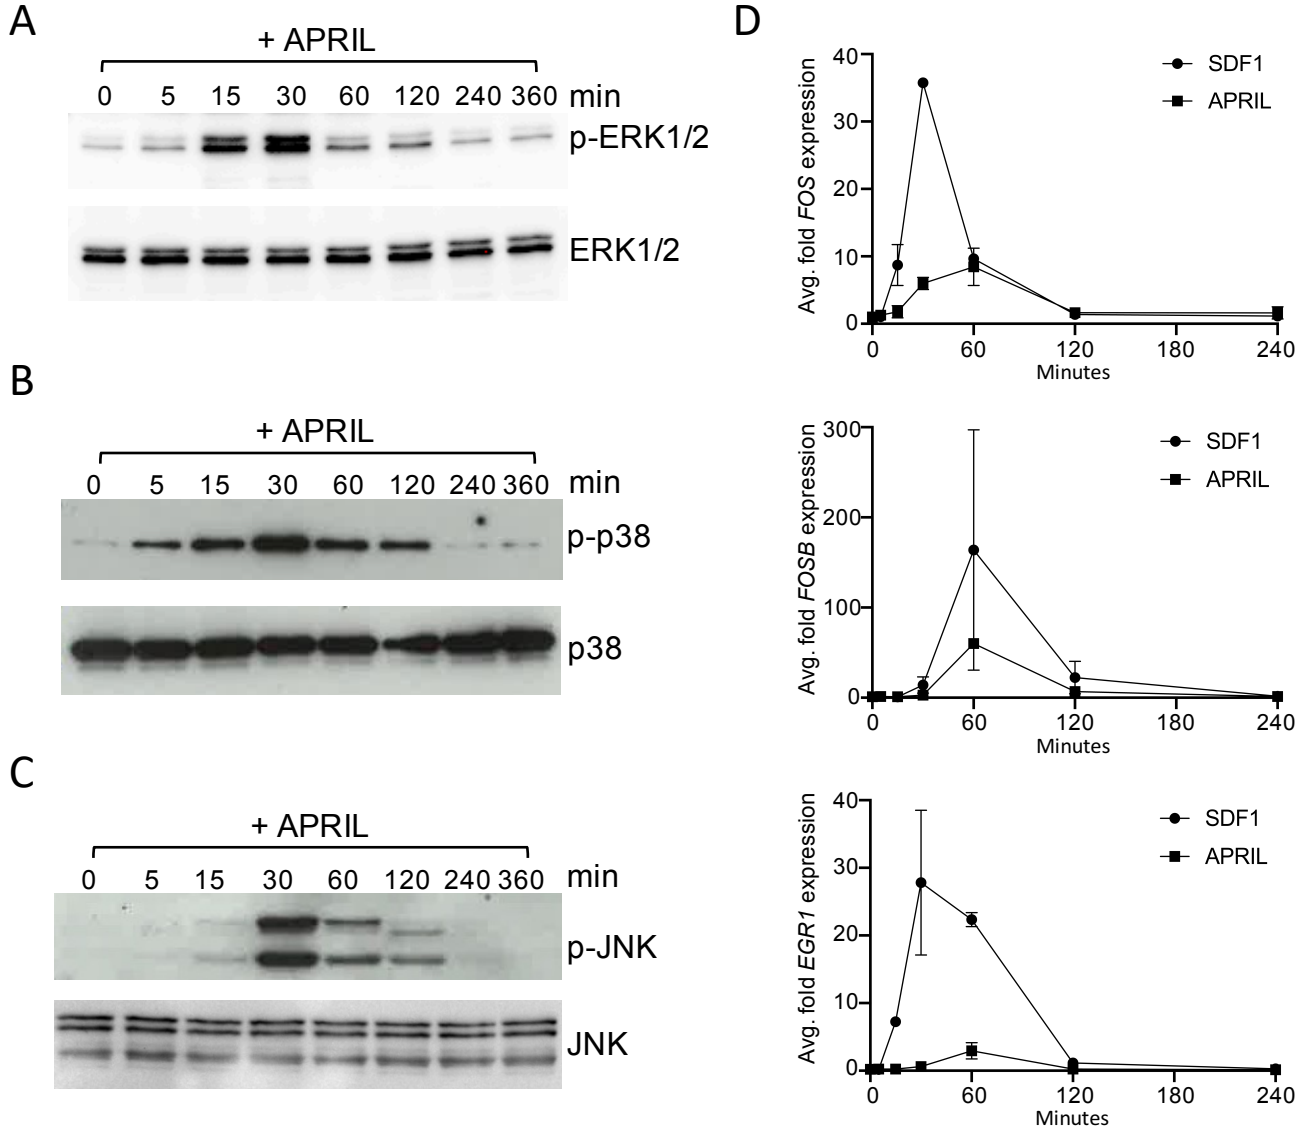



## Figure 4

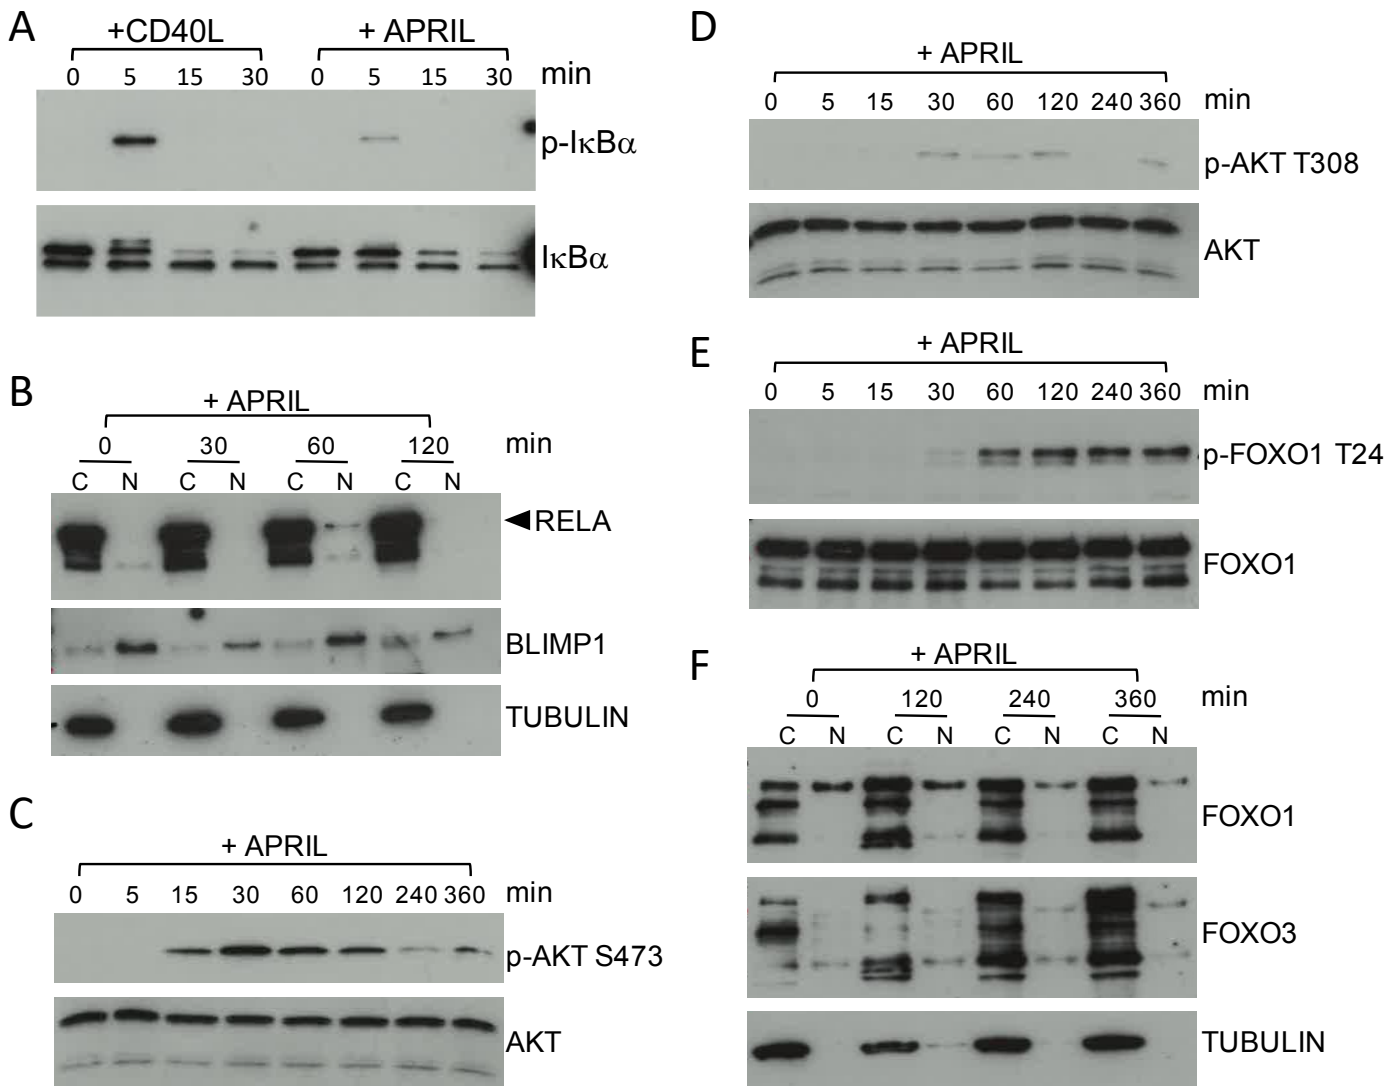

**Figure 5**

bioRxiv preprint doi: <https://doi.org/10.1101/2021.06.15.448496>; this version posted June 16, 2021. The copyright holder for this preprint (which was not certified by peer review) is the author/funder, who has granted bioRxiv a license to display the preprint in perpetuity. It is made available under aCC-BY 4.0 International license.

**A**

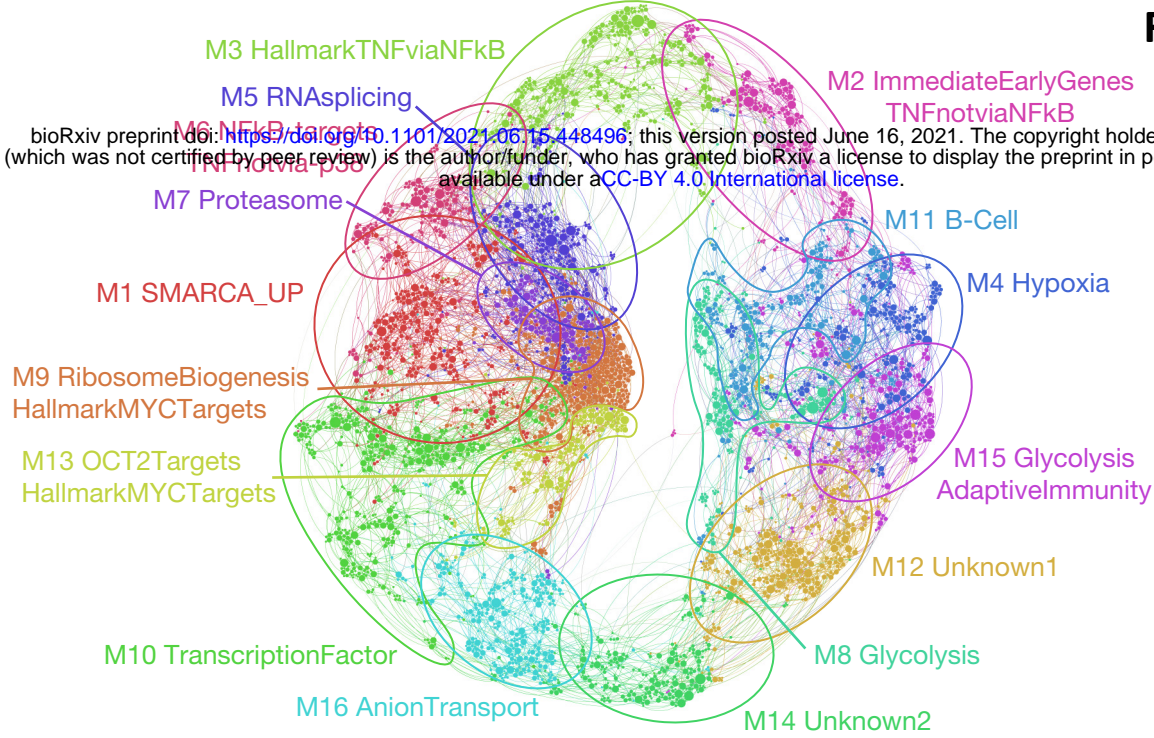

**B**

Multimerized-APRIL →

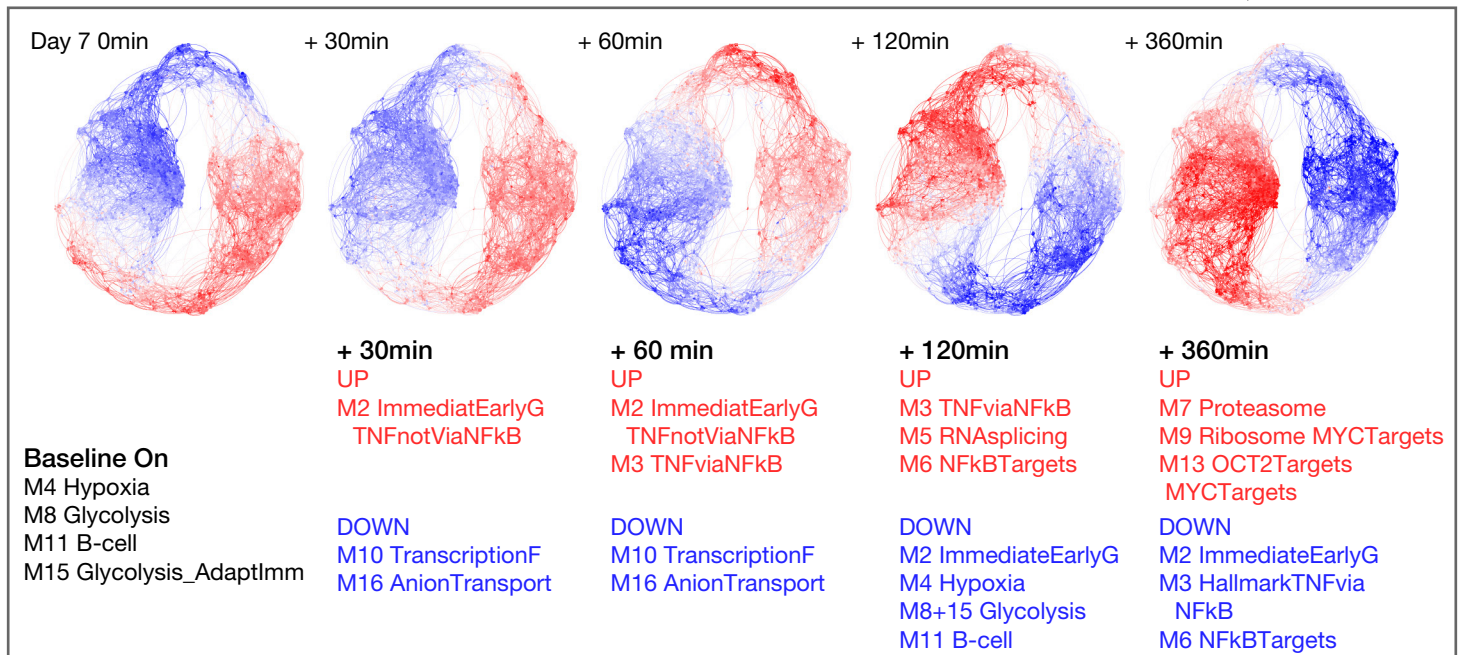

**C**

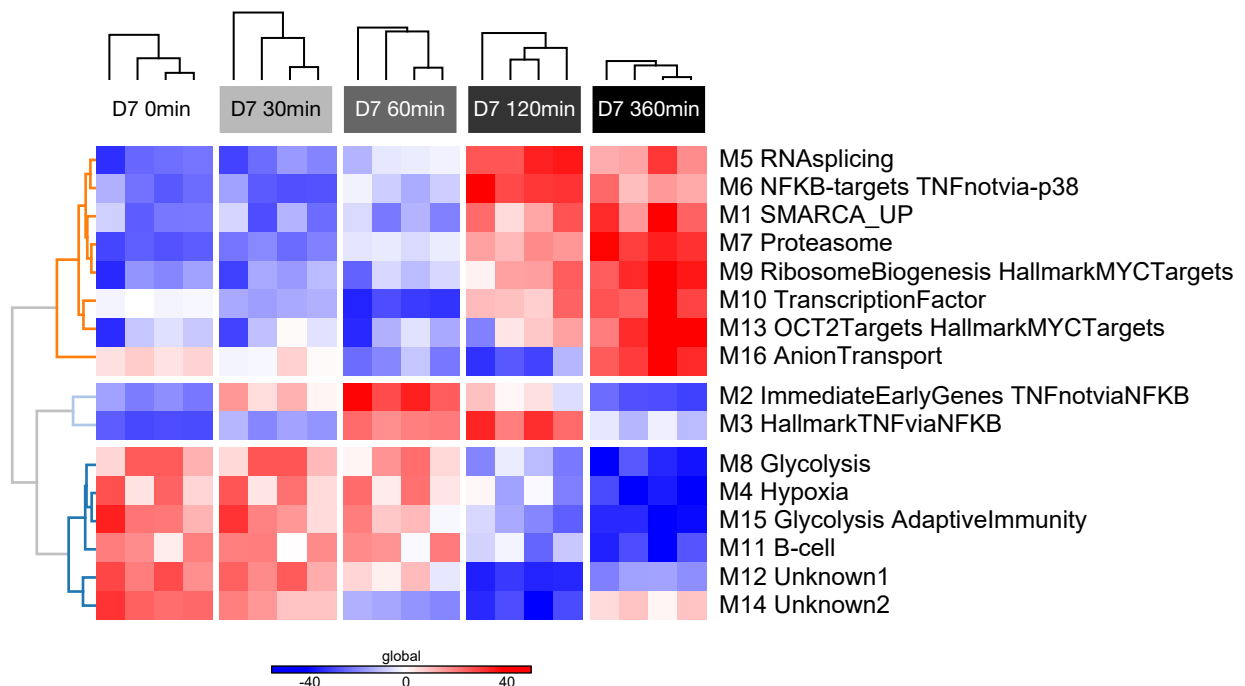

Figure 6

bioRxiv preprint doi: <https://doi.org/10.1101/2021.06.15.448496>; this version posted June 16, 2021. The copyright holder for this preprint (which was not certified by peer review) is the author/funder, who has granted bioRxiv a license to display the preprint in perpetuity. It is made available under aCC-BY 4.0 International license.

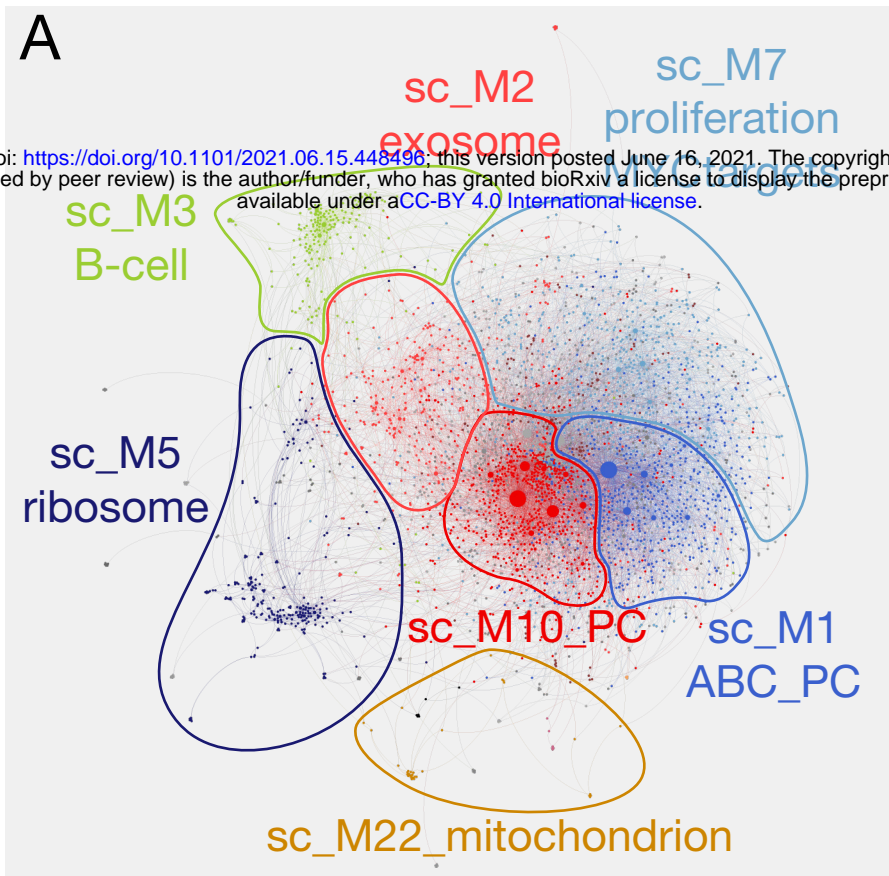

**B**

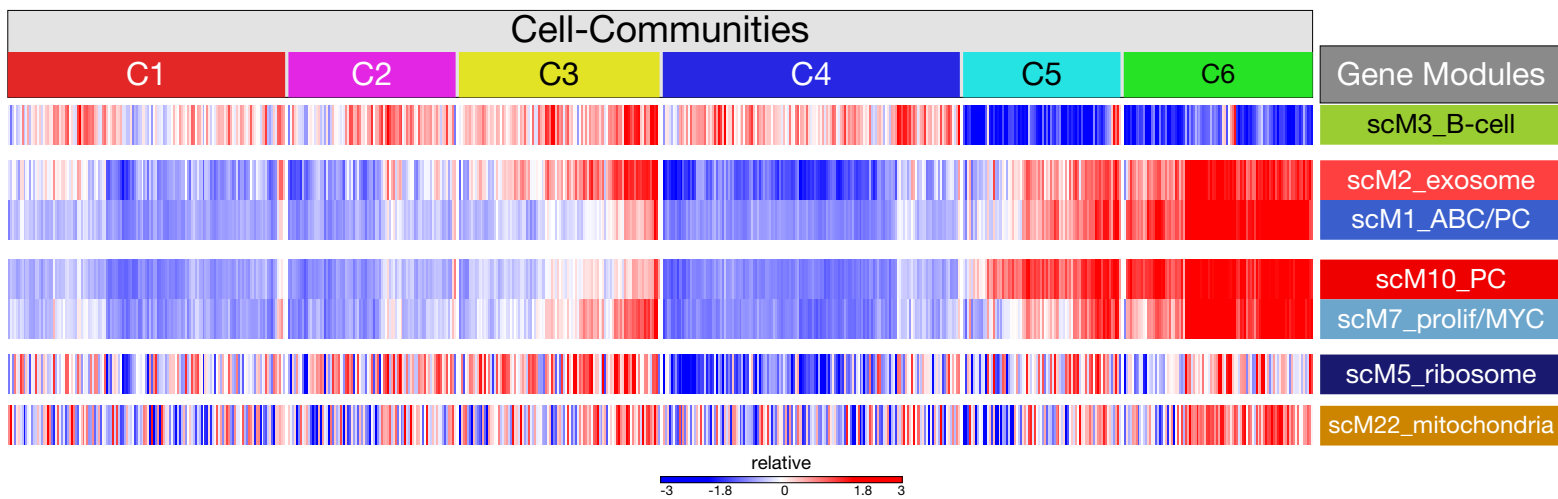

**C**

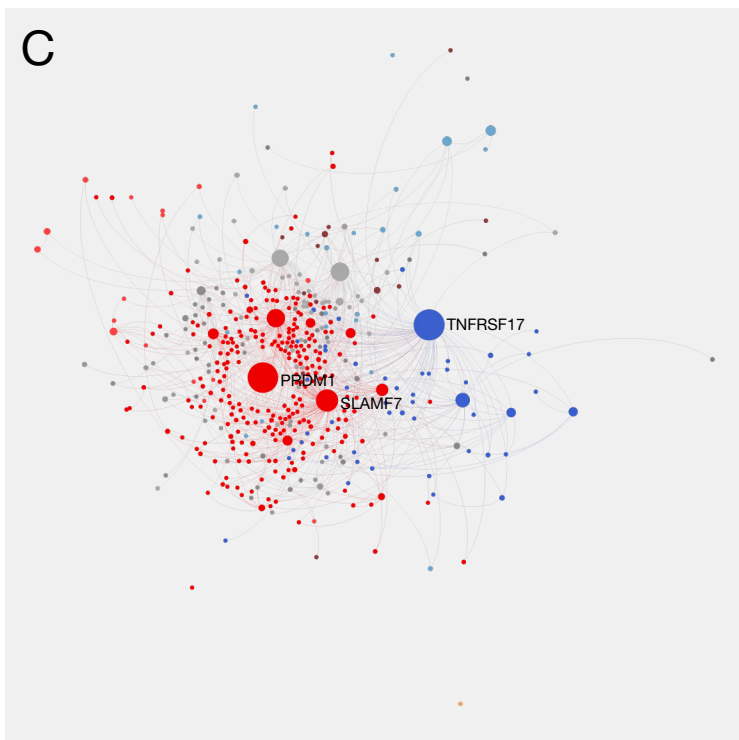

**D**

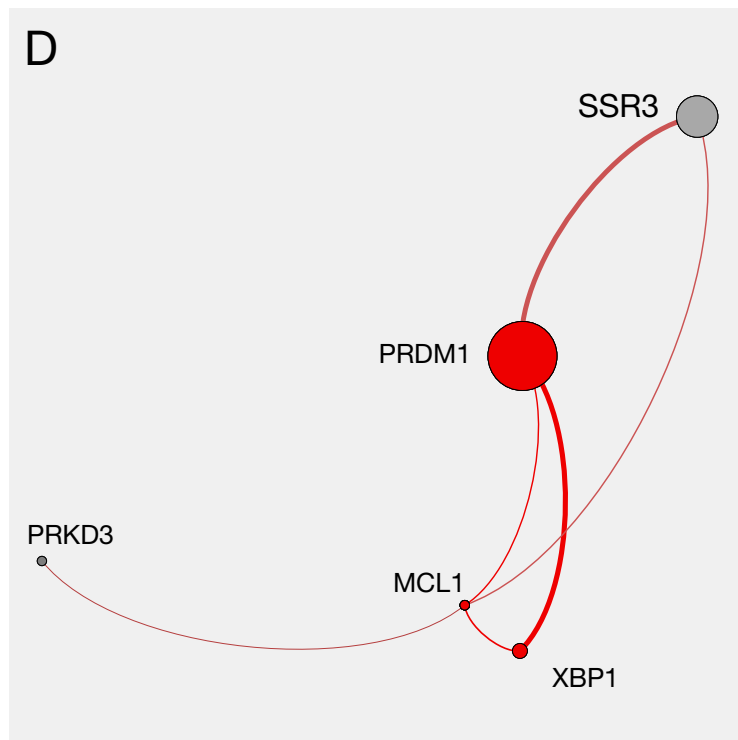

Figure 7

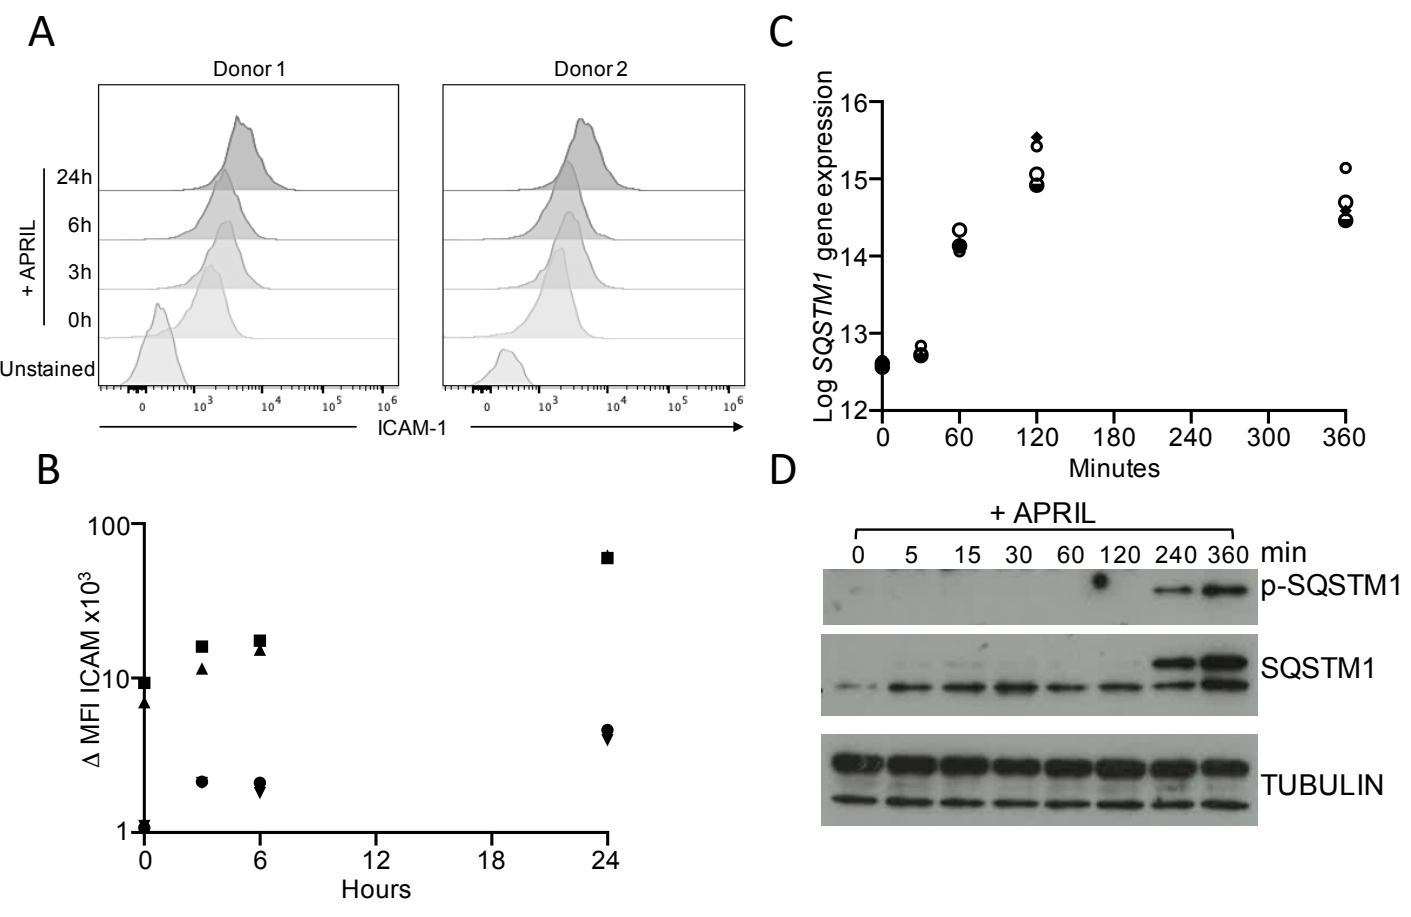

Source: https://www.biorxiv.org/content/biorxiv/early/2021/06/16/2021.06.15.448496.full.pdf
